# Supplementary material for: What people share about the COVID-19 outbreak on Twitter? An exploratory analysis
Source: PubMed Central journal article supplement — BMJ Health Care Inform. 2020 Nov 19;27(3):e100133. doi: 10.1136/bmjhci-2020-100133 (PMC7678227; doi:10.1136/bmjhci-2020-100133), 2020-11-19
Supplement: bmjhci-2020-100133supp001.pdf [file bmjhci-2020-100133supp001.pdf]

| status_id           | created_at | favorite count | retweet count | Theme 1                | Theme 2                |
|---------------------|------------|----------------|---------------|------------------------|------------------------|
| 1218255692831900000 | 17-Jan-20  | 160            | 112           | Health Information     |                        |
| 1218287060815110000 | 17-Jan-20  | 530            | 427           | Health Information     |                        |
| 1218288568277270000 | 17-Jan-20  | 206            | 148           | Health Information     |                        |
| 1218264254744340000 | 17-Jan-20  | 242            | 145           | General Information    | Health Information     |
| 1218253417241550000 | 17-Jan-20  | 127            | 103           | General Information    | Health Information     |
| 1218248508593040000 | 17-Jan-20  | 581            | 369           | General Information    | Health Information     |
| 1218247650723740000 | 17-Jan-20  | 434            | 303           | General Information    |                        |
| 1218670063240150000 | 18-Jan-20  | 315            | 167           | General Information    | Health Information     |
| 1218675285131910000 | 18-Jan-20  | 85             | 111           | General Information    |                        |
| 1218670562328790000 | 18-Jan-20  | 106            | 102           | General Information    | Expressions or Opinion |
| 1218582630947610000 | 18-Jan-20  | 136            | 145           | General Information    |                        |
| 1218574447638130000 | 18-Jan-20  | 676            | 683           | General Information    |                        |
| 1218544031409540000 | 18-Jan-20  | 248            | 137           | Health Information     |                        |
| 1218573492783800000 | 18-Jan-20  | 221            | 120           | Health Information     |                        |
| 1218530492619850000 | 18-Jan-20  | 219            | 130           | Health Information     |                        |
| 1218507579225260000 | 18-Jan-20  | 220            | 163           | Health Information     |                        |
| 1218525082819220000 | 18-Jan-20  | 233            | 166           | Health Information     |                        |
| 1218567782771710000 | 18-Jan-20  | 177            | 138           | Health Information     |                        |
| 1218517559701590000 | 18-Jan-20  | 171            | 115           | Health Information     |                        |
| 1218542690977170000 | 18-Jan-20  | 357            | 185           | Expressions or Opinion |                        |
| 1218544596126520000 | 18-Jan-20  | 862            | 813           | Health Information     | Expressions or Opinion |
| 1218407922364900000 | 18-Jan-20  | 210            | 269           | General Information    |                        |
| 1218541768314110000 | 18-Jan-20  | 203            | 238           | General Information    |                        |
| 1218346907468220000 | 18-Jan-20  | 324            | 323           | General Information    |                        |
| 1218526528687830000 | 18-Jan-20  | 155            | 144           | General Information    | Expressions or Opinion |
| 1218437643542750000 | 18-Jan-20  | 722            | 332           | Expressions or Opinion |                        |
| 1218424676831170000 | 18-Jan-20  | 268            | 205           | General Information    |                        |
| 1218405395456130000 | 18-Jan-20  | 180            | 171           | General Information    |                        |
| 1218390056299380000 | 18-Jan-20  | 244            | 146           | Health Information     |                        |
| 1218369105415360000 | 18-Jan-20  | 236            | 237           | Health Information     |                        |
| 1219031794416250000 | 19-Jan-20  | 199            | 146           | General Information    |                        |
| 1219027645201040000 | 19-Jan-20  | 357            | 314           | General Information    |                        |
| 1219026530636090000 | 19-Jan-20  | 4076           | 3406          | General Information    |                        |
| 1219028968407550000 | 19-Jan-20  | 371            | 298           | Health Information     |                        |
| 1219029891737370000 | 19-Jan-20  | 165            | 112           | Health Information     |                        |
| 1219029418800220000 | 19-Jan-20  | 266            | 173           | Health Information     |                        |
| 1219028183472900000 | 19-Jan-20  | 260            | 179           | Health Information     |                        |
| 1218980671885990000 | 19-Jan-20  | 271            | 181           | Health Information     |                        |
| 1218985016165790000 | 19-Jan-20  | 126            | 126           | General Information    |                        |
| 1218894930787140000 | 19-Jan-20  | 249            | 153           | General Information    |                        |
| 1218886935550230000 | 19-Jan-20  | 314            | 205           | General Information    |                        |
| 1218777406221290000 | 19-Jan-20  | 131            | 134           | General Information    |                        |
| 1218752023891530000 | 19-Jan-20  | 603            | 461           | Expressions or Opinion |                        |
| 1218733940715840000 | 19-Jan-20  | 425            | 479           | Health Information     |                        |
| 1219406470669910000 | 20-Jan-20  | 97             | 123           | Health Information     | General Information    |

|                     |           |       |      |                        |                     |
|---------------------|-----------|-------|------|------------------------|---------------------|
| 1219361746009250000 | 20-Jan-20 | 325   | 281  | General Information    |                     |
| 1219352272372550000 | 20-Jan-20 | 139   | 150  | Health Information     |                     |
| 1219399217246060000 | 20-Jan-20 | 590   | 591  | Health Information     |                     |
| 1219399217216720000 | 20-Jan-20 | 164   | 127  | Health Information     |                     |
| 1219394275269620000 | 20-Jan-20 | 934   | 977  | General Information    |                     |
| 1219390955905840000 | 20-Jan-20 | 479   | 383  | Health Information     | General Information |
| 1219306342583690000 | 20-Jan-20 | 151   | 111  | General Information    |                     |
| 1219385362847390000 | 20-Jan-20 | 93    | 103  | General Information    |                     |
| 1219303513106200000 | 20-Jan-20 | 134   | 155  | General Information    |                     |
| 1219369245940820000 | 20-Jan-20 | 19314 | 9952 | Sarcasm or Humour      |                     |
| 1219367890362730000 | 20-Jan-20 | 163   | 166  | Health Information     | General Information |
| 1219365461269210000 | 20-Jan-20 | 725   | 201  | Expressions or Opinion |                     |
| 1219350594936270000 | 20-Jan-20 | 126   | 109  | General Information    |                     |
| 1219346354176170000 | 20-Jan-20 | 221   | 232  | General Information    |                     |
| 1219349351602010000 | 20-Jan-20 | 595   | 244  | General Information    |                     |
| 1219338102952660000 | 20-Jan-20 | 1415  | 408  | Expressions or Opinion |                     |
| 1219333013861030000 | 20-Jan-20 | 704   | 336  | General Information    |                     |
| 1219323869510660000 | 20-Jan-20 | 1763  | 1046 | General Information    |                     |
| 1219345743841910000 | 20-Jan-20 | 88    | 109  | General Information    |                     |
| 1219336415223270000 | 20-Jan-20 | 219   | 140  | General Information    |                     |
| 1219341474954970000 | 20-Jan-20 | 388   | 315  | Health Information     |                     |
| 1219341420122820000 | 20-Jan-20 | 232   | 274  | Health Information     |                     |
| 1219327125666150000 | 20-Jan-20 | 363   | 343  | Others                 |                     |
| 1219313323440650000 | 20-Jan-20 | 354   | 340  | General Information    |                     |
| 1219321823801810000 | 20-Jan-20 | 82    | 114  | General Information    |                     |
| 1219321726351390000 | 20-Jan-20 | 765   | 585  | General Information    |                     |
| 1219320331082640000 | 20-Jan-20 | 715   | 149  | General Information    |                     |
| 1219318449702420000 | 20-Jan-20 | 1225  | 934  | Health Information     |                     |
| 1219317208205200000 | 20-Jan-20 | 5846  | 4434 | General Information    |                     |
| 1219316826338880000 | 20-Jan-20 | 888   | 215  | Others                 |                     |
| 1219314798711770000 | 20-Jan-20 | 2224  | 564  | General Information    |                     |
| 1219305818765560000 | 20-Jan-20 | 191   | 144  | Health Information     |                     |
| 1219311057136570000 | 20-Jan-20 | 119   | 138  | Expressions or Opinion |                     |
| 1219305363956210000 | 20-Jan-20 | 426   | 327  | General Information    |                     |
| 1219304094072010000 | 20-Jan-20 | 2550  | 379  | Sarcasm or Humour      |                     |
| 1219302786728450000 | 20-Jan-20 | 447   | 200  | Expressions or Opinion |                     |
| 1219301722637520000 | 20-Jan-20 | 178   | 153  | General Information    |                     |
| 1219706472797360000 | 21-Jan-20 | 1102  | 502  | General Information    |                     |
| 1219770567420600000 | 21-Jan-20 | 464   | 107  | General Information    |                     |
| 1219764675274890000 | 21-Jan-20 | 177   | 164  | General Information    |                     |
| 1219686678182480000 | 21-Jan-20 | 138   | 131  | General Information    |                     |
| 1219692090231270000 | 21-Jan-20 | 228   | 130  | Expressions or Opinion |                     |
| 1219769602340580000 | 21-Jan-20 | 1103  | 400  | Sarcasm or Humour      |                     |
| 1219769338900740000 | 21-Jan-20 | 667   | 424  | General Information    |                     |
| 1219752068115640000 | 21-Jan-20 | 94    | 114  | General Information    |                     |
| 1219767831950180000 | 21-Jan-20 | 352   | 275  | General Information    |                     |
| 1219718691790540000 | 21-Jan-20 | 635   | 217  | Expressions or Opinion |                     |

|                     |           |       |      |                        |  |
|---------------------|-----------|-------|------|------------------------|--|
| 1219695090391830000 | 21-Jan-20 | 210   | 197  | General Information    |  |
| 1219764649324730000 | 21-Jan-20 | 1442  | 1076 | General Information    |  |
| 1219757126463160000 | 21-Jan-20 | 205   | 230  | General Information    |  |
| 1219756813140270000 | 21-Jan-20 | 462   | 269  | General Information    |  |
| 1219740863464640000 | 21-Jan-20 | 611   | 180  | General Information    |  |
| 1219706864675490000 | 21-Jan-20 | 449   | 275  | General Information    |  |
| 1219695684003290000 | 21-Jan-20 | 11835 | 9499 | General Information    |  |
| 1219751808765170000 | 21-Jan-20 | 305   | 225  | General Information    |  |
| 1219707570581050000 | 21-Jan-20 | 450   | 372  | General Information    |  |
| 1219733682971380000 | 21-Jan-20 | 211   | 136  | Health Information     |  |
| 1219686139751280000 | 21-Jan-20 | 540   | 706  | General Information    |  |
| 1219749127388460000 | 21-Jan-20 | 295   | 124  | General Information    |  |
| 1219691360355340000 | 21-Jan-20 | 105   | 105  | General Information    |  |
| 1219708171297670000 | 21-Jan-20 | 199   | 202  | General Information    |  |
| 1219699699520870000 | 21-Jan-20 | 298   | 387  | General Information    |  |
| 1219745569272470000 | 21-Jan-20 | 1773  | 732  | Expressions or Opinion |  |
| 1219742150629390000 | 21-Jan-20 | 1082  | 743  | General Information    |  |
| 1219741363832440000 | 21-Jan-20 | 1060  | 230  | General Information    |  |
| 1219693867135640000 | 21-Jan-20 | 3161  | 2272 | General Information    |  |
| 1219738477715040000 | 21-Jan-20 | 158   | 104  | Health Information     |  |
| 1219737185630500000 | 21-Jan-20 | 464   | 360  | General Information    |  |
| 1219726842854330000 | 21-Jan-20 | 115   | 108  | General Information    |  |
| 1219736700093630000 | 21-Jan-20 | 776   | 713  | General Information    |  |
| 1219718647444360000 | 21-Jan-20 | 526   | 591  | General Information    |  |
| 1219736570019960000 | 21-Jan-20 | 1999  | 797  | Expressions or Opinion |  |
| 1219735427394890000 | 21-Jan-20 | 651   | 113  | Sarcasm or Humour      |  |
| 1219735069268590000 | 21-Jan-20 | 634   | 153  | Expressions or Opinion |  |
| 1219702194917820000 | 21-Jan-20 | 216   | 250  | General Information    |  |
| 1219687622303470000 | 21-Jan-20 | 144   | 103  | General Information    |  |
| 1219697070069530000 | 21-Jan-20 | 239   | 127  | General Information    |  |
| 1219732004448520000 | 21-Jan-20 | 458   | 159  | General Information    |  |
| 1219690788092880000 | 21-Jan-20 | 683   | 465  | General Information    |  |
| 1219689898195720000 | 21-Jan-20 | 329   | 247  | General Information    |  |
| 1219686715054540000 | 21-Jan-20 | 133   | 107  | General Information    |  |
| 1219731595210280000 | 21-Jan-20 | 680   | 153  | General Information    |  |
| 1219729575455960000 | 21-Jan-20 | 46    | 111  | General Information    |  |
| 1219728390334310000 | 21-Jan-20 | 499   | 164  | General Information    |  |
| 1219726757164560000 | 21-Jan-20 | 905   | 585  | Expressions or Opinion |  |
| 1219698717885890000 | 21-Jan-20 | 70    | 105  | General Information    |  |
| 1219725742843610000 | 21-Jan-20 | 256   | 240  | Health Information     |  |
| 1219725877359120000 | 21-Jan-20 | 147   | 128  | General Information    |  |
| 1219725632906690000 | 21-Jan-20 | 1112  | 1279 | General Information    |  |
| 1219724030758080000 | 21-Jan-20 | 64    | 146  | General Information    |  |
| 1219719424632150000 | 21-Jan-20 | 1962  | 1465 | General Information    |  |
| 1219717071698890000 | 21-Jan-20 | 252   | 154  | General Information    |  |
| 1219690544936430000 | 21-Jan-20 | 2916  | 2510 | General Information    |  |
| 1219717068163100000 | 21-Jan-20 | 610   | 113  | Sarcasm or Humour      |  |

|                     |           |      |      |                        |  |
|---------------------|-----------|------|------|------------------------|--|
| 1219716796456030000 | 21-Jan-20 | 123  | 132  | General Information    |  |
| 1219711919986260000 | 21-Jan-20 | 125  | 101  | General Information    |  |
| 1219714894066520000 | 21-Jan-20 | 243  | 101  | Sarcasm or Humour      |  |
| 1219714200311940000 | 21-Jan-20 | 379  | 376  | General Information    |  |
| 1219713023256020000 | 21-Jan-20 | 668  | 157  | General Information    |  |
| 1219710963617860000 | 21-Jan-20 | 105  | 208  | General Information    |  |
| 1219706962851560000 | 21-Jan-20 | 1091 | 1033 | General Information    |  |
| 1219687614497910000 | 21-Jan-20 | 724  | 822  | General Information    |  |
| 1219697786276450000 | 21-Jan-20 | 128  | 144  | General Information    |  |
| 1219684553847110000 | 21-Jan-20 | 77   | 111  | General Information    |  |
| 1219684881439030000 | 21-Jan-20 | 1364 | 1387 | General Information    |  |
| 1219704684618880000 | 21-Jan-20 | 57   | 110  | General Information    |  |
| 1219699439935210000 | 21-Jan-20 | 85   | 121  | General Information    |  |
| 1219704157352820000 | 21-Jan-20 | 258  | 196  | General Information    |  |
| 1219702891885330000 | 21-Jan-20 | 453  | 126  | General Information    |  |
| 1219701048258060000 | 21-Jan-20 | 108  | 114  | General Information    |  |
| 1219700635962080000 | 21-Jan-20 | 788  | 196  | General Information    |  |
| 1219700458664740000 | 21-Jan-20 | 118  | 200  | General Information    |  |
| 1219700176836860000 | 21-Jan-20 | 168  | 192  | General Information    |  |
| 1219694975828440000 | 21-Jan-20 | 3473 | 1584 | General Information    |  |
| 1219696293972340000 | 21-Jan-20 | 1694 | 483  | General Information    |  |
| 1219698632217110000 | 21-Jan-20 | 631  | 280  | General Information    |  |
| 1219699008509300000 | 21-Jan-20 | 161  | 325  | General Information    |  |
| 1219698761393370000 | 21-Jan-20 | 164  | 101  | Health Information     |  |
| 1219697831138730000 | 21-Jan-20 | 101  | 140  | General Information    |  |
| 1219697483263150000 | 21-Jan-20 | 158  | 143  | Others                 |  |
| 1219696794067700000 | 21-Jan-20 | 208  | 162  | General Information    |  |
| 1219696267170840000 | 21-Jan-20 | 191  | 208  | General Information    |  |
| 1219684489598600000 | 21-Jan-20 | 209  | 154  | Health Information     |  |
| 1219695146259840000 | 21-Jan-20 | 5636 | 5440 | General Information    |  |
| 1219694644558160000 | 21-Jan-20 | 185  | 194  | General Information    |  |
| 1219693495763520000 | 21-Jan-20 | 572  | 529  | General Information    |  |
| 1219694371995630000 | 21-Jan-20 | 1547 | 421  | Expressions or Opinion |  |
| 1219693950593850000 | 21-Jan-20 | 156  | 155  | General Information    |  |
| 1219692661969490000 | 21-Jan-20 | 250  | 128  | General Information    |  |
| 1219690507951050000 | 21-Jan-20 | 130  | 101  | General Information    |  |
| 1219690190052180000 | 21-Jan-20 | 124  | 202  | General Information    |  |
| 1219687393663550000 | 21-Jan-20 | 97   | 103  | General Information    |  |
| 1219687974960390000 | 21-Jan-20 | 441  | 393  | General Information    |  |
| 1219687852486940000 | 21-Jan-20 | 185  | 194  | General Information    |  |
| 1219683350182420000 | 21-Jan-20 | 915  | 967  | Health Information     |  |
| 1219681555116770000 | 21-Jan-20 | 263  | 131  | Expressions or Opinion |  |
| 1220121708222220000 | 22-Jan-20 | 1458 | 202  | General Information    |  |
| 1220133922467650000 | 22-Jan-20 | 195  | 136  | Health Information     |  |
| 1220133762282980000 | 22-Jan-20 | 174  | 242  | Health Information     |  |
| 1220133759153990000 | 22-Jan-20 | 216  | 145  | General Information    |  |
| 1220133562722210000 | 22-Jan-20 | 434  | 268  | General Information    |  |

|                     |           |       |       |                        |                        |
|---------------------|-----------|-------|-------|------------------------|------------------------|
| 1220133366844010000 | 22-Jan-20 | 162   | 149   | General Information    |                        |
| 1220109498011900000 | 22-Jan-20 | 350   | 342   | Health Information     |                        |
| 1220132761488350000 | 22-Jan-20 | 463   | 259   | General Information    |                        |
| 1220129343222900000 | 22-Jan-20 | 352   | 118   | General Information    |                        |
| 1220132273703410000 | 22-Jan-20 | 509   | 424   | General Information    |                        |
| 1220087829319110000 | 22-Jan-20 | 954   | 529   | Expressions or Opinion |                        |
| 1220055590057250000 | 22-Jan-20 | 251   | 274   | General Information    |                        |
| 1220132009990860000 | 22-Jan-20 | 679   | 255   | General Information    |                        |
| 1220043555256840000 | 22-Jan-20 | 825   | 309   | General Information    |                        |
| 1220115206271040000 | 22-Jan-20 | 219   | 175   | General Information    |                        |
| 1220131212620180000 | 22-Jan-20 | 2515  | 1100  | Sarcasm or Humour      |                        |
| 1220127645507040000 | 22-Jan-20 | 454   | 244   | Sarcasm or Humour      |                        |
| 1220130634338720000 | 22-Jan-20 | 211   | 123   | General Information    |                        |
| 1220072014716780000 | 22-Jan-20 | 642   | 430   | General Information    |                        |
| 1220073445465160000 | 22-Jan-20 | 318   | 107   | Expressions or Opinion |                        |
| 1220129664741580000 | 22-Jan-20 | 246   | 153   | Others                 |                        |
| 1220128357972440000 | 22-Jan-20 | 3125  | 346   | Others                 |                        |
| 1220127192841110000 | 22-Jan-20 | 199   | 173   | General Information    |                        |
| 1220126204386210000 | 22-Jan-20 | 314   | 132   | Expressions or Opinion | General Information    |
| 1220064801403150000 | 22-Jan-20 | 182   | 112   | Health Information     |                        |
| 1220082987552980000 | 22-Jan-20 | 136   | 150   | General Information    |                        |
| 1220040618082210000 | 22-Jan-20 | 249   | 129   | Expressions or Opinion |                        |
| 1220053882153450000 | 22-Jan-20 | 221   | 143   | General Information    |                        |
| 1220125011727400000 | 22-Jan-20 | 168   | 109   | General Information    |                        |
| 1220124555647290000 | 22-Jan-20 | 9780  | 7922  | Expressions or Opinion |                        |
| 1220110812540530000 | 22-Jan-20 | 110   | 103   | General Information    |                        |
| 1220079502191220000 | 22-Jan-20 | 2128  | 1924  | General Information    |                        |
| 1220122406066490000 | 22-Jan-20 | 278   | 149   | General Information    | Expressions or Opinion |
| 1220056586456110000 | 22-Jan-20 | 702   | 559   | General Information    |                        |
| 1220103883667560000 | 22-Jan-20 | 141   | 107   | General Information    |                        |
| 1220122092944920000 | 22-Jan-20 | 1754  | 2884  | General Information    |                        |
| 1220068338732190000 | 22-Jan-20 | 11985 | 10662 | Expressions or Opinion | General Information    |
| 1220120187900310000 | 22-Jan-20 | 585   | 228   | Health Information     |                        |
| 1220118701560730000 | 22-Jan-20 | 1614  | 616   | Expressions or Opinion |                        |
| 1220117437879730000 | 22-Jan-20 | 581   | 247   | Expressions or Opinion |                        |
| 1220117324759550000 | 22-Jan-20 | 1227  | 152   | General Information    |                        |
| 1220080601241470000 | 22-Jan-20 | 219   | 174   | General Information    |                        |
| 1220115893314890000 | 22-Jan-20 | 411   | 432   | General Information    |                        |
| 1220079942047840000 | 22-Jan-20 | 2719  | 1947  | General Information    | Expressions or Opinion |
| 1220085083584880000 | 22-Jan-20 | 529   | 864   | Health Information     | Expressions or Opinion |
| 1220112073419630000 | 22-Jan-20 | 528   | 610   | Health Information     |                        |
| 1220078014127490000 | 22-Jan-20 | 247   | 214   | General Information    |                        |
| 1220104997934730000 | 22-Jan-20 | 630   | 620   | Health Information     |                        |
| 1220076700412860000 | 22-Jan-20 | 114   | 109   | Health Information     |                        |
| 1220086443906920000 | 22-Jan-20 | 171   | 141   | General Information    |                        |
| 1220111108679380000 | 22-Jan-20 | 1113  | 724   | General Information    |                        |
| 1220052882596280000 | 22-Jan-20 | 1256  | 1268  | General Information    |                        |

|                     |           |       |      |                        |                        |
|---------------------|-----------|-------|------|------------------------|------------------------|
| 1220110525960450000 | 22-Jan-20 | 96    | 120  | General Information    |                        |
| 1220108725706320000 | 22-Jan-20 | 1891  | 331  | General Information    |                        |
| 1220107465221640000 | 22-Jan-20 | 398   | 178  | General Information    |                        |
| 1220108788491080000 | 22-Jan-20 | 881   | 344  | Expressions or Opinion |                        |
| 1220083605311010000 | 22-Jan-20 | 131   | 101  | General Information    |                        |
| 1220055007283890000 | 22-Jan-20 | 307   | 165  | General Information    |                        |
| 1220079737722320000 | 22-Jan-20 | 852   | 206  | General Information    |                        |
| 1220108482852060000 | 22-Jan-20 | 244   | 222  | General Information    |                        |
| 1220106050529110000 | 22-Jan-20 | 83    | 102  | General Information    |                        |
| 1220106030996120000 | 22-Jan-20 | 364   | 210  | General Information    | Expressions or Opinion |
| 1220066301395260000 | 22-Jan-20 | 368   | 331  | General Information    |                        |
| 1220103172443770000 | 22-Jan-20 | 625   | 363  | General Information    |                        |
| 1220079774158190000 | 22-Jan-20 | 191   | 169  | General Information    |                        |
| 1220102973214330000 | 22-Jan-20 | 172   | 129  | General Information    |                        |
| 1220054309301290000 | 22-Jan-20 | 422   | 142  | Expressions or Opinion |                        |
| 1220060879112280000 | 22-Jan-20 | 1670  | 1846 | General Information    |                        |
| 1220075857928180000 | 22-Jan-20 | 113   | 105  | General Information    |                        |
| 1220099859115650000 | 22-Jan-20 | 962   | 622  | General Information    |                        |
| 1220099229701420000 | 22-Jan-20 | 240   | 218  | General Information    |                        |
| 1220093157456480000 | 22-Jan-20 | 144   | 112  | General Information    |                        |
| 1220040407100290000 | 22-Jan-20 | 151   | 165  | General Information    |                        |
| 1220095136903890000 | 22-Jan-20 | 415   | 222  | Expressions or Opinion |                        |
| 1220094037673280000 | 22-Jan-20 | 685   | 428  | General Information    |                        |
| 1220090041806070000 | 22-Jan-20 | 467   | 489  | Expressions or Opinion |                        |
| 1220073019088960000 | 22-Jan-20 | 334   | 211  | General Information    |                        |
| 1220088914268110000 | 22-Jan-20 | 248   | 155  | General Information    |                        |
| 1220088391754280000 | 22-Jan-20 | 191   | 149  | Health Information     |                        |
| 1220085838966650000 | 22-Jan-20 | 310   | 114  | Health Information     |                        |
| 1220074115836620000 | 22-Jan-20 | 407   | 258  | General Information    |                        |
| 1220075731784550000 | 22-Jan-20 | 281   | 177  | General Information    |                        |
| 1220076250888390000 | 22-Jan-20 | 176   | 124  | General Information    |                        |
| 1220076702522650000 | 22-Jan-20 | 275   | 143  | General Information    |                        |
| 1220071324405510000 | 22-Jan-20 | 2877  | 2516 | General Information    |                        |
| 1220072733721210000 | 22-Jan-20 | 209   | 146  | General Information    |                        |
| 1220085157052520000 | 22-Jan-20 | 340   | 225  | General Information    |                        |
| 1220072413700010000 | 22-Jan-20 | 156   | 161  | General Information    |                        |
| 1220082305009690000 | 22-Jan-20 | 280   | 196  | General Information    |                        |
| 1220083255518510000 | 22-Jan-20 | 141   | 187  | Expressions or Opinion |                        |
| 1220083078703350000 | 22-Jan-20 | 13266 | 3603 | Others                 |                        |
| 1220072502556270000 | 22-Jan-20 | 167   | 119  | General Information    |                        |
| 1220082891494970000 | 22-Jan-20 | 909   | 208  | Sarcasm or Humour      |                        |
| 1220081201572080000 | 22-Jan-20 | 553   | 510  | General Information    |                        |
| 1220080673769380000 | 22-Jan-20 | 3877  | 770  | General Information    |                        |
| 1220077193226790000 | 22-Jan-20 | 6920  | 2999 | General Information    |                        |
| 1220076494019410000 | 22-Jan-20 | 161   | 111  | Health Information     |                        |
| 1220075543015640000 | 22-Jan-20 | 353   | 373  | General Information    |                        |
| 1220057175504060000 | 22-Jan-20 | 185   | 182  | General Information    |                        |

|                     |           |       |      |                        |                        |
|---------------------|-----------|-------|------|------------------------|------------------------|
| 1220073905647490000 | 22-Jan-20 | 1230  | 278  | Expressions or Opinion |                        |
| 1220073756112060000 | 22-Jan-20 | 259   | 200  | Health Information     |                        |
| 1220073253504500000 | 22-Jan-20 | 982   | 833  | Health Information     |                        |
| 1220072046257990000 | 22-Jan-20 | 1210  | 327  | Sarcasm or Humour      |                        |
| 1220064955778550000 | 22-Jan-20 | 148   | 127  | General Information    |                        |
| 1220071616891240000 | 22-Jan-20 | 173   | 132  | General Information    |                        |
| 1220070620257570000 | 22-Jan-20 | 216   | 162  | General Information    |                        |
| 1220070438362990000 | 22-Jan-20 | 953   | 453  | General Information    |                        |
| 1220070391940620000 | 22-Jan-20 | 1015  | 782  | General Information    |                        |
| 1220070134473160000 | 22-Jan-20 | 498   | 489  | General Information    |                        |
| 1220070127598730000 | 22-Jan-20 | 1537  | 856  | General Information    |                        |
| 1220063010393210000 | 22-Jan-20 | 144   | 104  | General Information    |                        |
| 1220051014163880000 | 22-Jan-20 | 121   | 118  | General Information    |                        |
| 1220069485815770000 | 22-Jan-20 | 209   | 204  | General Information    |                        |
| 1220069758005120000 | 22-Jan-20 | 12300 | 7481 | General Information    |                        |
| 1220064158240200000 | 22-Jan-20 | 88    | 111  | General Information    |                        |
| 1220068409196630000 | 22-Jan-20 | 187   | 130  | General Information    |                        |
| 1220068741431660000 | 22-Jan-20 | 172   | 115  | General Information    |                        |
| 1220069065353500000 | 22-Jan-20 | 103   | 184  | General Information    |                        |
| 1220068645839280000 | 22-Jan-20 | 1073  | 852  | General Information    | Expressions or Opinion |
| 1220068557494500000 | 22-Jan-20 | 369   | 163  | General Information    |                        |
| 1220068469527330000 | 22-Jan-20 | 513   | 415  | General Information    |                        |
| 1220068071005650000 | 22-Jan-20 | 668   | 559  | General Information    |                        |
| 1220059835644940000 | 22-Jan-20 | 927   | 813  | General Information    |                        |
| 1220067639541860000 | 22-Jan-20 | 255   | 175  | General Information    | Expressions or Opinion |
| 1220050298019800000 | 22-Jan-20 | 152   | 171  | General Information    |                        |
| 1220067217963910000 | 22-Jan-20 | 1109  | 982  | General Information    |                        |
| 1220067206429650000 | 22-Jan-20 | 1384  | 683  | General Information    |                        |
| 1220056303256650000 | 22-Jan-20 | 308   | 186  | General Information    |                        |
| 1220065330443110000 | 22-Jan-20 | 830   | 322  | General Information    |                        |
| 1220063351570480000 | 22-Jan-20 | 2364  | 1102 | General Information    |                        |
| 1220063249741290000 | 22-Jan-20 | 152   | 132  | General Information    |                        |
| 1220058769465460000 | 22-Jan-20 | 250   | 178  | General Information    |                        |
| 1220062726891790000 | 22-Jan-20 | 689   | 449  | General Information    |                        |
| 1220062037402960000 | 22-Jan-20 | 305   | 268  | General Information    |                        |
| 1220061270445050000 | 22-Jan-20 | 222   | 233  | General Information    |                        |
| 1220060752326900000 | 22-Jan-20 | 3072  | 2452 | General Information    |                        |
| 1220060594868550000 | 22-Jan-20 | 1128  | 691  | General Information    |                        |
| 1220058993042840000 | 22-Jan-20 | 571   | 162  | General Information    |                        |
| 1220047943694040000 | 22-Jan-20 | 2912  | 3162 | General Information    |                        |
| 1220054328863440000 | 22-Jan-20 | 153   | 119  | General Information    |                        |
| 1220057422477300000 | 22-Jan-20 | 130   | 116  | General Information    |                        |
| 1220058921098000000 | 22-Jan-20 | 248   | 139  | General Information    |                        |
| 1220055924829830000 | 22-Jan-20 | 382   | 265  | General Information    |                        |
| 1220050766892650000 | 22-Jan-20 | 159   | 141  | General Information    |                        |
| 1220056852550970000 | 22-Jan-20 | 707   | 618  | General Information    | Expressions or Opinion |
| 1220054382349180000 | 22-Jan-20 | 145   | 160  | General Information    |                        |

|                     |           |      |      |                        |                        |
|---------------------|-----------|------|------|------------------------|------------------------|
| 1220052637875230000 | 22-Jan-20 | 257  | 286  | General Information    |                        |
| 1220053848812850000 | 22-Jan-20 | 155  | 148  | General Information    |                        |
| 1220052549929180000 | 22-Jan-20 | 526  | 165  | Others                 |                        |
| 1220052392865080000 | 22-Jan-20 | 262  | 211  | General Information    |                        |
| 1220052587531120000 | 22-Jan-20 | 951  | 666  | General Information    |                        |
| 1220051943155850000 | 22-Jan-20 | 635  | 382  | Health Information     |                        |
| 1220051221538630000 | 22-Jan-20 | 220  | 146  | General Information    |                        |
| 1220049843130900000 | 22-Jan-20 | 168  | 147  | General Information    |                        |
| 1220048379222330000 | 22-Jan-20 | 1479 | 217  | Sarcasm or Humour      |                        |
| 1220044376891510000 | 22-Jan-20 | 326  | 181  | Expressions or Opinion |                        |
| 1220044358294160000 | 22-Jan-20 | 89   | 124  | Sarcasm or Humour      |                        |
| 1220044355114790000 | 22-Jan-20 | 1905 | 407  | Expressions or Opinion |                        |
| 1220041939447420000 | 22-Jan-20 | 1188 | 971  | General Information    | Expressions or Opinion |
| 1220038277903930000 | 22-Jan-20 | 608  | 202  | Sarcasm or Humour      |                        |
| 1220037840823770000 | 22-Jan-20 | 463  | 346  | Sarcasm or Humour      |                        |
| 1220457232757900000 | 23-Jan-20 | 1683 | 937  | Health Information     |                        |
| 1220496131446030000 | 23-Jan-20 | 421  | 272  | Health Information     |                        |
| 1220492577687750000 | 23-Jan-20 | 310  | 159  | Health Information     |                        |
| 1220471038233820000 | 23-Jan-20 | 1687 | 1150 | General Information    |                        |
| 1220495277036990000 | 23-Jan-20 | 345  | 145  | Health Information     |                        |
| 1220494431737900000 | 23-Jan-20 | 382  | 167  | General Information    |                        |
| 1220491726214710000 | 23-Jan-20 | 1735 | 667  | Expressions or Opinion |                        |
| 1220470473026190000 | 23-Jan-20 | 366  | 178  | Expressions or Opinion | General Information    |
| 1220459228462290000 | 23-Jan-20 | 339  | 185  | Health Information     |                        |
| 1220495771964860000 | 23-Jan-20 | 567  | 592  | Health Information     |                        |
| 1220495745897430000 | 23-Jan-20 | 199  | 172  | General Information    |                        |
| 1220494958093680000 | 23-Jan-20 | 136  | 127  | General Information    |                        |
| 1220495543132020000 | 23-Jan-20 | 141  | 179  | Health Information     |                        |
| 1220484190493450000 | 23-Jan-20 | 1570 | 1548 | General Information    |                        |
| 1220482993191550000 | 23-Jan-20 | 107  | 145  | General Information    |                        |
| 1220494421256350000 | 23-Jan-20 | 135  | 102  | Expressions or Opinion | General Information    |
| 1220493743301760000 | 23-Jan-20 | 79   | 104  | General Information    | Expressions or Opinion |
| 1220492405620650000 | 23-Jan-20 | 481  | 683  | General Information    | Health Information     |
| 1220492280580260000 | 23-Jan-20 | 534  | 347  | Expressions or Opinion |                        |
| 1220461482019780000 | 23-Jan-20 | 231  | 175  | General Information    |                        |
| 1220491578705410000 | 23-Jan-20 | 165  | 252  | Health Information     |                        |
| 1220491276811890000 | 23-Jan-20 | 256  | 272  | General Information    |                        |
| 1220491160810060000 | 23-Jan-20 | 231  | 204  | General Information    |                        |
| 1220441118057340000 | 23-Jan-20 | 318  | 338  | General Information    |                        |
| 1220429805637810000 | 23-Jan-20 | 925  | 315  | Sarcasm or Humour      |                        |
| 1220489895736740000 | 23-Jan-20 | 382  | 183  | Expressions or Opinion |                        |
| 1220451669940620000 | 23-Jan-20 | 1418 | 497  | Expressions or Opinion |                        |
| 1220430619433470000 | 23-Jan-20 | 708  | 403  | Sarcasm or Humour      |                        |
| 1220450140684790000 | 23-Jan-20 | 761  | 499  | General Information    |                        |
| 1220452736501800000 | 23-Jan-20 | 921  | 219  | Expressions or Opinion |                        |
| 1220489760424110000 | 23-Jan-20 | 455  | 374  | General Information    |                        |
| 1220489274967100000 | 23-Jan-20 | 1914 | 1663 | General Information    |                        |

|                     |           |      |      |                        |                        |
|---------------------|-----------|------|------|------------------------|------------------------|
| 1220447472687940000 | 23-Jan-20 | 221  | 243  | General Information    |                        |
| 1220489271146160000 | 23-Jan-20 | 126  | 117  | General Information    |                        |
| 1220481782866480000 | 23-Jan-20 | 187  | 190  | General Information    |                        |
| 1220487693622230000 | 23-Jan-20 | 9203 | 1998 | Sarcasm or Humour      |                        |
| 1220486084125180000 | 23-Jan-20 | 256  | 340  | General Information    |                        |
| 1220484608430680000 | 23-Jan-20 | 229  | 363  | General Information    |                        |
| 1220481378426520000 | 23-Jan-20 | 256  | 107  | Expressions or Opinion |                        |
| 1220483090599950000 | 23-Jan-20 | 542  | 128  | Health Information     |                        |
| 1220482740560120000 | 23-Jan-20 | 342  | 134  | General Information    |                        |
| 1220472420743720000 | 23-Jan-20 | 174  | 226  | General Information    |                        |
| 1220481992401110000 | 23-Jan-20 | 95   | 154  | Expressions or Opinion |                        |
| 1220481660958970000 | 23-Jan-20 | 612  | 533  | General Information    |                        |
| 1220481479878330000 | 23-Jan-20 | 360  | 191  | General Information    |                        |
| 1220481391361710000 | 23-Jan-20 | 314  | 200  | General Information    |                        |
| 1220480391791820000 | 23-Jan-20 | 451  | 761  | General Information    |                        |
| 1220464986125990000 | 23-Jan-20 | 1234 | 136  | Others                 |                        |
| 1220466361937290000 | 23-Jan-20 | 602  | 684  | General Information    |                        |
| 1220469185542800000 | 23-Jan-20 | 2047 | 1861 | General Information    |                        |
| 1220478372947590000 | 23-Jan-20 | 2147 | 167  | Sarcasm or Humour      |                        |
| 1220476760384580000 | 23-Jan-20 | 1069 | 178  | General Information    |                        |
| 1220461649427070000 | 23-Jan-20 | 1255 | 216  | Expressions or Opinion |                        |
| 1220476568012650000 | 23-Jan-20 | 77   | 276  | General Information    |                        |
| 1220467582450400000 | 23-Jan-20 | 422  | 355  | General Information    |                        |
| 1220471075479470000 | 23-Jan-20 | 167  | 123  | General Information    |                        |
| 1220446517837940000 | 23-Jan-20 | 249  | 135  | General Information    |                        |
| 1220439568454960000 | 23-Jan-20 | 117  | 119  | General Information    |                        |
| 1220427862282580000 | 23-Jan-20 | 209  | 169  | General Information    |                        |
| 1220435312301800000 | 23-Jan-20 | 268  | 166  | General Information    |                        |
| 1220457071025570000 | 23-Jan-20 | 579  | 495  | Expressions or Opinion |                        |
| 1220476140772640000 | 23-Jan-20 | 162  | 132  | Expressions or Opinion | General Information    |
| 1220476107859860000 | 23-Jan-20 | 173  | 105  | Expressions or Opinion |                        |
| 1220474839594620000 | 23-Jan-20 | 397  | 337  | Expressions or Opinion | General Information    |
| 1220474819948440000 | 23-Jan-20 | 506  | 116  | Others                 |                        |
| 1220473786019070000 | 23-Jan-20 | 1324 | 990  | General Information    |                        |
| 1220472519871880000 | 23-Jan-20 | 318  | 182  | General Information    |                        |
| 1220437496280020000 | 23-Jan-20 | 109  | 158  | General Information    |                        |
| 1220470233238030000 | 23-Jan-20 | 965  | 750  | General Information    |                        |
| 1220441302795460000 | 23-Jan-20 | 636  | 590  | General Information    |                        |
| 1220469109378500000 | 23-Jan-20 | 728  | 603  | General Information    |                        |
| 1220468860236810000 | 23-Jan-20 | 338  | 235  | General Information    |                        |
| 1220458536699940000 | 23-Jan-20 | 275  | 256  | General Information    |                        |
| 1220468321637800000 | 23-Jan-20 | 223  | 245  | General Information    |                        |
| 1220466035784020000 | 23-Jan-20 | 793  | 196  | Sarcasm or Humour      |                        |
| 1220465323356440000 | 23-Jan-20 | 196  | 113  | General Information    |                        |
| 1220464726313880000 | 23-Jan-20 | 421  | 244  | Expressions or Opinion |                        |
| 1220464512773630000 | 23-Jan-20 | 315  | 204  | General Information    | Expressions or Opinion |
| 1220464228127130000 | 23-Jan-20 | 2426 | 349  | Expressions or Opinion |                        |

|                     |           |       |       |                        |                        |
|---------------------|-----------|-------|-------|------------------------|------------------------|
| 1220463908043080000 | 23-Jan-20 | 363   | 196   | Health Information     | General Information    |
| 1220464110833410000 | 23-Jan-20 | 139   | 123   | General Information    | Expressions or Opinion |
| 1220463892469610000 | 23-Jan-20 | 95    | 116   | General Information    |                        |
| 1220463040321150000 | 23-Jan-20 | 96    | 104   | General Information    |                        |
| 1220446698952180000 | 23-Jan-20 | 98    | 152   | General Information    |                        |
| 1220461015219030000 | 23-Jan-20 | 106   | 113   | General Information    |                        |
| 1220456126543730000 | 23-Jan-20 | 151   | 178   | General Information    | Expressions or Opinion |
| 1220458640836100000 | 23-Jan-20 | 1974  | 123   | Sarcasm or Humour      |                        |
| 1220456543000450000 | 23-Jan-20 | 1271  | 733   | Expressions or Opinion | General Information    |
| 1220433141980100000 | 23-Jan-20 | 1043  | 519   | General Information    |                        |
| 1220436587965750000 | 23-Jan-20 | 1160  | 278   | General Information    |                        |
| 1220449810328750000 | 23-Jan-20 | 2956  | 1395  | General Information    |                        |
| 1220454307377700000 | 23-Jan-20 | 830   | 445   | General Information    |                        |
| 1220453162018130000 | 23-Jan-20 | 221   | 133   | General Information    |                        |
| 1220453752198650000 | 23-Jan-20 | 857   | 826   | Expressions or Opinion |                        |
| 1220453637140480000 | 23-Jan-20 | 410   | 118   | Expressions or Opinion |                        |
| 1220452650547920000 | 23-Jan-20 | 497   | 107   | Others                 |                        |
| 1220452229586600000 | 23-Jan-20 | 50    | 103   | General Information    |                        |
| 1220432608246590000 | 23-Jan-20 | 66    | 114   | General Information    |                        |
| 1220438841653450000 | 23-Jan-20 | 271   | 145   | General Information    | Expressions or Opinion |
| 1220432093714550000 | 23-Jan-20 | 3383  | 1816  | General Information    |                        |
| 1220450281504360000 | 23-Jan-20 | 3531  | 2926  | General Information    |                        |
| 1220449571312230000 | 23-Jan-20 | 806   | 778   | General Information    |                        |
| 1220445298167890000 | 23-Jan-20 | 159   | 193   | Health Information     |                        |
| 1220447850494030000 | 23-Jan-20 | 192   | 105   | Expressions or Opinion |                        |
| 1220447819837980000 | 23-Jan-20 | 391   | 233   | General Information    |                        |
| 1220447599326650000 | 23-Jan-20 | 593   | 397   | Expressions or Opinion |                        |
| 1220447271264960000 | 23-Jan-20 | 205   | 176   | General Information    |                        |
| 1220446056439340000 | 23-Jan-20 | 660   | 468   | Expressions or Opinion |                        |
| 1220435374285120000 | 23-Jan-20 | 275   | 498   | General Information    |                        |
| 1220435418384150000 | 23-Jan-20 | 526   | 249   | Health Information     |                        |
| 1220443663878230000 | 23-Jan-20 | 227   | 118   | Expressions or Opinion |                        |
| 1220443483812630000 | 23-Jan-20 | 78    | 104   | Expressions or Opinion |                        |
| 1220443350869900000 | 23-Jan-20 | 159   | 107   | Health Information     |                        |
| 1220442194571660000 | 23-Jan-20 | 678   | 852   | General Information    |                        |
| 1220441226488500000 | 23-Jan-20 | 476   | 290   | General Information    | Expressions or Opinion |
| 1220436957324500000 | 23-Jan-20 | 788   | 619   | General Information    |                        |
| 1220440723146850000 | 23-Jan-20 | 1743  | 2944  | General Information    |                        |
| 1220440518733300000 | 23-Jan-20 | 13977 | 1245  | Expressions or Opinion |                        |
| 1220431841615900000 | 23-Jan-20 | 278   | 126   | General Information    |                        |
| 1220437976200740000 | 23-Jan-20 | 159   | 217   | General Information    |                        |
| 1220436083604890000 | 23-Jan-20 | 269   | 168   | Expressions or Opinion |                        |
| 1220432447713790000 | 23-Jan-20 | 94    | 132   | Expressions or Opinion |                        |
| 1220432401500980000 | 23-Jan-20 | 446   | 251   | General Information    |                        |
| 1220431288567460000 | 23-Jan-20 | 309   | 269   | General Information    |                        |
| 1220430582653640000 | 23-Jan-20 | 19385 | 22450 | Health Information     |                        |
| 1220428027781420000 | 23-Jan-20 | 253   | 283   | General Information    |                        |

|                     |           |      |      |                        |                        |
|---------------------|-----------|------|------|------------------------|------------------------|
| 1220428924771060000 | 23-Jan-20 | 239  | 219  | General Information    |                        |
| 1220847422211080000 | 24-Jan-20 | 155  | 135  | General Information    | Expressions or Opinion |
| 1220858231804870000 | 24-Jan-20 | 108  | 116  | General Information    |                        |
| 1220858124468390000 | 24-Jan-20 | 234  | 294  | General Information    |                        |
| 1220819339751930000 | 24-Jan-20 | 178  | 191  | General Information    |                        |
| 1220857237356280000 | 24-Jan-20 | 1667 | 949  | Health Information     |                        |
| 1220857911292940000 | 24-Jan-20 | 877  | 395  | Expressions or Opinion |                        |
| 1220856786602930000 | 24-Jan-20 | 3477 | 3562 | General Information    |                        |
| 1220857618782170000 | 24-Jan-20 | 1068 | 637  | Health Information     |                        |
| 1220857779478360000 | 24-Jan-20 | 244  | 197  | General Information    |                        |
| 1220852484341670000 | 24-Jan-20 | 204  | 113  | Health Information     |                        |
| 1220857775825340000 | 24-Jan-20 | 192  | 275  | General Information    |                        |
| 1220857200974810000 | 24-Jan-20 | 155  | 111  | General Information    |                        |
| 1220857120561610000 | 24-Jan-20 | 281  | 315  | Expressions or Opinion | General Information    |
| 1220842196124850000 | 24-Jan-20 | 3653 | 1758 | General Information    |                        |
| 1220855282810670000 | 24-Jan-20 | 1062 | 892  | Expressions or Opinion | General Information    |
| 1220803869460060000 | 24-Jan-20 | 705  | 749  | General Information    |                        |
| 1220811622152840000 | 24-Jan-20 | 780  | 729  | General Information    |                        |
| 1220850537421330000 | 24-Jan-20 | 3603 | 693  | Health Information     |                        |
| 1220853829090130000 | 24-Jan-20 | 628  | 376  | Health Information     |                        |
| 1220853788648460000 | 24-Jan-20 | 1002 | 897  | Health Information     |                        |
| 1220848755844380000 | 24-Jan-20 | 322  | 291  | General Information    |                        |
| 1220843727243090000 | 24-Jan-20 | 303  | 233  | General Information    |                        |
| 1220816131633490000 | 24-Jan-20 | 181  | 238  | General Information    |                        |
| 1220852383913290000 | 24-Jan-20 | 6244 | 789  | Sarcasm or Humour      |                        |
| 1220852282767470000 | 24-Jan-20 | 1441 | 467  | Sarcasm or Humour      |                        |
| 1220832340190090000 | 24-Jan-20 | 222  | 300  | General Information    |                        |
| 1220851193485890000 | 24-Jan-20 | 228  | 168  | General Information    |                        |
| 1220850638965260000 | 24-Jan-20 | 410  | 181  | Expressions or Opinion |                        |
| 1220823499821810000 | 24-Jan-20 | 656  | 325  | Expressions or Opinion |                        |
| 1220850325151780000 | 24-Jan-20 | 524  | 280  | General Information    |                        |
| 1220850045140050000 | 24-Jan-20 | 219  | 152  | General Information    |                        |
| 1220811537318840000 | 24-Jan-20 | 105  | 138  | General Information    |                        |
| 1220831432462990000 | 24-Jan-20 | 195  | 164  | General Information    |                        |
| 1220809320868250000 | 24-Jan-20 | 1015 | 681  | Others                 |                        |
| 1220849830135820000 | 24-Jan-20 | 126  | 118  | Expressions or Opinion | General Information    |
| 1220848916997860000 | 24-Jan-20 | 679  | 709  | General Information    |                        |
| 1220848872144210000 | 24-Jan-20 | 170  | 231  | Expressions or Opinion | General Information    |
| 1220848820717850000 | 24-Jan-20 | 86   | 102  | General Information    |                        |
| 1220848227798470000 | 24-Jan-20 | 1140 | 1020 | General Information    |                        |
| 1220848140603080000 | 24-Jan-20 | 145  | 129  | General Information    |                        |
| 1220833164144190000 | 24-Jan-20 | 146  | 101  | General Information    |                        |
| 1220848092297080000 | 24-Jan-20 | 81   | 115  | Expressions or Opinion | General Information    |
| 1220847235165930000 | 24-Jan-20 | 81   | 107  | Expressions or Opinion | General Information    |
| 1220846939677290000 | 24-Jan-20 | 596  | 434  | General Information    |                        |
| 1220830368980480000 | 24-Jan-20 | 236  | 159  | General Information    |                        |
| 1220846323324410000 | 24-Jan-20 | 471  | 373  | General Information    |                        |

|                     |           |       |       |                        |                        |
|---------------------|-----------|-------|-------|------------------------|------------------------|
| 1220805005122440000 | 24-Jan-20 | 489   | 565   | General Information    |                        |
| 1220839183943680000 | 24-Jan-20 | 302   | 238   | Expressions or Opinion | General Information    |
| 1220804566045920000 | 24-Jan-20 | 503   | 534   | General Information    |                        |
| 1220819809337790000 | 24-Jan-20 | 159   | 106   | Expressions or Opinion |                        |
| 1220842783000250000 | 24-Jan-20 | 18566 | 22041 | Health Information     |                        |
| 1220843826937580000 | 24-Jan-20 | 711   | 127   | General Information    |                        |
| 1220841855795040000 | 24-Jan-20 | 418   | 340   | General Information    |                        |
| 1220841595840250000 | 24-Jan-20 | 458   | 249   | General Information    |                        |
| 1220840575785500000 | 24-Jan-20 | 150   | 101   | General Information    |                        |
| 1220840166643750000 | 24-Jan-20 | 11101 | 1578  | Others                 |                        |
| 1220817457109250000 | 24-Jan-20 | 153   | 157   | General Information    |                        |
| 1220811332171090000 | 24-Jan-20 | 640   | 583   | General Information    |                        |
| 1220832204944700000 | 24-Jan-20 | 137   | 139   | General Information    |                        |
| 1220830204454670000 | 24-Jan-20 | 177   | 190   | General Information    |                        |
| 1220822005580060000 | 24-Jan-20 | 198   | 151   | General Information    | Expressions or Opinion |
| 1220839017467510000 | 24-Jan-20 | 1112  | 597   | General Information    | Expressions or Opinion |
| 1220838941147810000 | 24-Jan-20 | 95682 | 20297 | Expressions or Opinion |                        |
| 1220838075724520000 | 24-Jan-20 | 87    | 117   | General Information    |                        |
| 1220838057051590000 | 24-Jan-20 | 79    | 141   | General Information    |                        |
| 1220836982324110000 | 24-Jan-20 | 329   | 295   | General Information    |                        |
| 1220835185270420000 | 24-Jan-20 | 355   | 238   | Health Information     | General Information    |
| 1220833179696810000 | 24-Jan-20 | 2137  | 2001  | General Information    | Health Information     |
| 1220832851073140000 | 24-Jan-20 | 272   | 422   | General Information    |                        |
| 1220831697295500000 | 24-Jan-20 | 885   | 669   | General Information    |                        |
| 1220829551552450000 | 24-Jan-20 | 303   | 259   | Expressions or Opinion |                        |
| 1220829408669440000 | 24-Jan-20 | 143   | 113   | General Information    |                        |
| 1220829014811600000 | 24-Jan-20 | 462   | 642   | Health Information     |                        |
| 1220826155265160000 | 24-Jan-20 | 722   | 712   | General Information    |                        |
| 1220826933417700000 | 24-Jan-20 | 692   | 127   | Expressions or Opinion |                        |
| 1220805585203000000 | 24-Jan-20 | 116   | 107   | General Information    |                        |
| 1220823688104370000 | 24-Jan-20 | 237   | 163   | General Information    |                        |
| 1220822800300110000 | 24-Jan-20 | 164   | 108   | General Information    |                        |
| 1220822043039370000 | 24-Jan-20 | 441   | 270   | General Information    | Sarcasm or Humour      |
| 1220821339877100000 | 24-Jan-20 | 2400  | 353   | General Information    |                        |
| 1220821058103560000 | 24-Jan-20 | 3799  | 735   | Others                 |                        |
| 1220820873826840000 | 24-Jan-20 | 14298 | 1930  | Expressions or Opinion |                        |
| 1220820373261830000 | 24-Jan-20 | 219   | 141   | General Information    |                        |
| 1220819839159270000 | 24-Jan-20 | 49    | 111   | Expressions or Opinion | General Information    |
| 1220819795039470000 | 24-Jan-20 | 196   | 135   | Health Information     |                        |
| 1220819029843150000 | 24-Jan-20 | 4677  | 463   | General Information    | Expressions or Opinion |
| 1220817331938640000 | 24-Jan-20 | 414   | 126   | Others                 |                        |
| 1220814434140150000 | 24-Jan-20 | 781   | 434   | General Information    |                        |
| 1220813573334710000 | 24-Jan-20 | 1255  | 622   | Others                 |                        |
| 1220812327769030000 | 24-Jan-20 | 362   | 170   | General Information    |                        |
| 1220807858947640000 | 24-Jan-20 | 120   | 159   | General Information    |                        |
| 1220805461827640000 | 24-Jan-20 | 2760  | 551   | Sarcasm or Humour      |                        |
| 1220804716243710000 | 24-Jan-20 | 506   | 409   | General Information    |                        |

|                     |           |      |      |                        |                     |
|---------------------|-----------|------|------|------------------------|---------------------|
| 1220804271538670000 | 24-Jan-20 | 509  | 264  | General Information    |                     |
| 1221213171664460000 | 25-Jan-20 | 6018 | 1478 | General Information    |                     |
| 1221221075188470000 | 25-Jan-20 | 168  | 136  | Health Information     |                     |
| 1221221063662740000 | 25-Jan-20 | 352  | 212  | Others                 |                     |
| 1221211151674920000 | 25-Jan-20 | 661  | 358  | Expressions or Opinion |                     |
| 1221221061791870000 | 25-Jan-20 | 458  | 337  | Expressions or Opinion |                     |
| 1221220998000800000 | 25-Jan-20 | 111  | 197  | Others                 |                     |
| 1221220978941930000 | 25-Jan-20 | 175  | 128  | Others                 |                     |
| 1221195926984900000 | 25-Jan-20 | 338  | 346  | General Information    |                     |
| 1221220920288850000 | 25-Jan-20 | 132  | 155  | General Information    |                     |
| 1221173654911960000 | 25-Jan-20 | 145  | 151  | Others                 |                     |
| 1221220916274790000 | 25-Jan-20 | 278  | 189  | Expressions or Opinion | General Information |
| 1221212770957490000 | 25-Jan-20 | 377  | 339  | General Information    |                     |
| 1221220481216520000 | 25-Jan-20 | 91   | 124  | General Information    |                     |
| 1221186340458560000 | 25-Jan-20 | 728  | 585  | General Information    |                     |
| 1221219855568900000 | 25-Jan-20 | 609  | 108  | Expressions or Opinion |                     |
| 1221219395562690000 | 25-Jan-20 | 1194 | 1068 | Health Information     |                     |
| 1221218787871130000 | 25-Jan-20 | 736  | 194  | Sarcasm or Humour      |                     |
| 1221218515576870000 | 25-Jan-20 | 196  | 226  | General Information    |                     |
| 1221205151429480000 | 25-Jan-20 | 232  | 273  | General Information    |                     |
| 1221213637672610000 | 25-Jan-20 | 145  | 182  | General Information    |                     |
| 1221182202618300000 | 25-Jan-20 | 518  | 508  | General Information    |                     |
| 1221186599100320000 | 25-Jan-20 | 238  | 251  | General Information    |                     |
| 1221216099435510000 | 25-Jan-20 | 450  | 387  | Health Information     | General Information |
| 1221218155042950000 | 25-Jan-20 | 939  | 452  | Sarcasm or Humour      |                     |
| 1221218023111040000 | 25-Jan-20 | 5624 | 2582 | General Information    |                     |
| 1221205185252510000 | 25-Jan-20 | 226  | 158  | Others                 |                     |
| 1221217672307910000 | 25-Jan-20 | 1771 | 404  | Expressions or Opinion |                     |
| 1221184062343330000 | 25-Jan-20 | 219  | 239  | Others                 |                     |
| 1221202388276730000 | 25-Jan-20 | 322  | 160  | Expressions or Opinion |                     |
| 1221207863634290000 | 25-Jan-20 | 170  | 140  | General Information    |                     |
| 1221216505569910000 | 25-Jan-20 | 237  | 198  | General Information    |                     |
| 1221215798401750000 | 25-Jan-20 | 191  | 249  | General Information    |                     |
| 1221201697550360000 | 25-Jan-20 | 626  | 660  | General Information    |                     |
| 1221213960839410000 | 25-Jan-20 | 325  | 115  | Expressions or Opinion |                     |
| 1221213703443480000 | 25-Jan-20 | 1358 | 199  | Expressions or Opinion | General Information |
| 1221193615936040000 | 25-Jan-20 | 123  | 122  | Expressions or Opinion | General Information |
| 1221199391630990000 | 25-Jan-20 | 397  | 175  | Expressions or Opinion |                     |
| 1221179204491990000 | 25-Jan-20 | 5346 | 5285 | General Information    |                     |
| 1221213618320100000 | 25-Jan-20 | 271  | 155  | General Information    |                     |
| 1221211838936820000 | 25-Jan-20 | 201  | 197  | General Information    |                     |
| 1221213324135810000 | 25-Jan-20 | 647  | 309  | Sarcasm or Humour      |                     |
| 1221196989343370000 | 25-Jan-20 | 461  | 214  | Sarcasm or Humour      |                     |
| 1221194786113230000 | 25-Jan-20 | 373  | 503  | General Information    |                     |
| 1221213122595210000 | 25-Jan-20 | 705  | 501  | General Information    |                     |
| 1221213073652040000 | 25-Jan-20 | 3605 | 4170 | General Information    |                     |
| 1221204024382360000 | 25-Jan-20 | 251  | 155  | General Information    |                     |

|                     |           |      |      |                        |                        |
|---------------------|-----------|------|------|------------------------|------------------------|
| 1221212659510570000 | 25-Jan-20 | 153  | 116  | General Information    |                        |
| 1221201157365870000 | 25-Jan-20 | 2241 | 2585 | General Information    |                        |
| 1221201691007230000 | 25-Jan-20 | 398  | 313  | General Information    |                        |
| 1221212607073270000 | 25-Jan-20 | 325  | 158  | Others                 |                        |
| 1221201700947520000 | 25-Jan-20 | 794  | 372  | General Information    |                        |
| 1221208846405750000 | 25-Jan-20 | 1912 | 900  | General Information    |                        |
| 1221197855399890000 | 25-Jan-20 | 719  | 374  | General Information    |                        |
| 1221196133482940000 | 25-Jan-20 | 7154 | 3484 | General Information    |                        |
| 1221206880015370000 | 25-Jan-20 | 4844 | 2739 | General Information    |                        |
| 1221209553322180000 | 25-Jan-20 | 1499 | 968  | General Information    |                        |
| 1221199579724430000 | 25-Jan-20 | 375  | 163  | General Information    |                        |
| 1221212371332390000 | 25-Jan-20 | 478  | 221  | General Information    |                        |
| 1221206180757790000 | 25-Jan-20 | 191  | 188  | General Information    |                        |
| 1221211990019820000 | 25-Jan-20 | 2520 | 3731 | General Information    |                        |
| 1221208004248440000 | 25-Jan-20 | 542  | 393  | Expressions or Opinion |                        |
| 1221211679276570000 | 25-Jan-20 | 890  | 467  | General Information    |                        |
| 1221199849791630000 | 25-Jan-20 | 430  | 282  | General Information    |                        |
| 1221211057391380000 | 25-Jan-20 | 901  | 367  | Sarcasm or Humour      | Expressions or Opinion |
| 1221191335190890000 | 25-Jan-20 | 151  | 144  | General Information    |                        |
| 1221207863319810000 | 25-Jan-20 | 165  | 184  | General Information    |                        |
| 1221210225916760000 | 25-Jan-20 | 190  | 136  | Health Information     |                        |
| 1221203478241890000 | 25-Jan-20 | 376  | 185  | Sarcasm or Humour      | Expressions or Opinion |
| 1221210102096510000 | 25-Jan-20 | 145  | 127  | Expressions or Opinion |                        |
| 1221201128957720000 | 25-Jan-20 | 559  | 510  | General Information    |                        |
| 1221209161112960000 | 25-Jan-20 | 343  | 312  | General Information    |                        |
| 1221208644706010000 | 25-Jan-20 | 1973 | 1030 | Expressions or Opinion |                        |
| 1221208108489490000 | 25-Jan-20 | 303  | 176  | Others                 |                        |
| 1221208572576640000 | 25-Jan-20 | 313  | 154  | General Information    |                        |
| 1221201947732200000 | 25-Jan-20 | 122  | 111  | General Information    |                        |
| 1221206357258440000 | 25-Jan-20 | 575  | 168  | General Information    | Expressions or Opinion |
| 1221206546174130000 | 25-Jan-20 | 623  | 232  | General Information    |                        |
| 1221208353721990000 | 25-Jan-20 | 1238 | 444  | Sarcasm or Humour      |                        |
| 1221207885784340000 | 25-Jan-20 | 200  | 123  | General Information    |                        |
| 1221207320778210000 | 25-Jan-20 | 1739 | 704  | Expressions or Opinion |                        |
| 1221206963167640000 | 25-Jan-20 | 209  | 137  | Expressions or Opinion |                        |
| 1221206739133060000 | 25-Jan-20 | 214  | 133  | General Information    |                        |
| 1221206213540490000 | 25-Jan-20 | 327  | 226  | Expressions or Opinion |                        |
| 1221202076627270000 | 25-Jan-20 | 94   | 128  | General Information    |                        |
| 1221170916614340000 | 25-Jan-20 | 317  | 207  | General Information    |                        |
| 1221205007279750000 | 25-Jan-20 | 816  | 197  | Expressions or Opinion |                        |
| 1221201643242380000 | 25-Jan-20 | 266  | 237  | General Information    |                        |
| 1221191257143300000 | 25-Jan-20 | 160  | 147  | General Information    |                        |
| 1221202983695680000 | 25-Jan-20 | 131  | 112  | General Information    |                        |
| 1221202509785710000 | 25-Jan-20 | 296  | 269  | Health Information     |                        |
| 1221202547643440000 | 25-Jan-20 | 334  | 430  | General Information    |                        |
| 1221201714465910000 | 25-Jan-20 | 184  | 246  | General Information    |                        |
| 1221202053927700000 | 25-Jan-20 | 889  | 1034 | General Information    |                        |

|                     |           |      |      |                        |                        |
|---------------------|-----------|------|------|------------------------|------------------------|
| 1221201969185900000 | 25-Jan-20 | 157  | 107  | Expressions or Opinion |                        |
| 1221201171785840000 | 25-Jan-20 | 261  | 422  | General Information    |                        |
| 1221191250256090000 | 25-Jan-20 | 599  | 315  | General Information    |                        |
| 1221199064420630000 | 25-Jan-20 | 797  | 955  | Health Information     |                        |
| 1221194420327970000 | 25-Jan-20 | 155  | 192  | General Information    |                        |
| 1221174657669360000 | 25-Jan-20 | 412  | 306  | General Information    |                        |
| 1221198224070970000 | 25-Jan-20 | 358  | 270  | General Information    |                        |
| 1221171294802230000 | 25-Jan-20 | 371  | 272  | General Information    |                        |
| 1221197841780960000 | 25-Jan-20 | 245  | 163  | Expressions or Opinion |                        |
| 1221196824515470000 | 25-Jan-20 | 4850 | 3852 | Others                 |                        |
| 1221195590522080000 | 25-Jan-20 | 462  | 476  | General Information    |                        |
| 1221195500076110000 | 25-Jan-20 | 101  | 113  | General Information    |                        |
| 1221195166402240000 | 25-Jan-20 | 426  | 315  | General Information    |                        |
| 1221194409867380000 | 25-Jan-20 | 859  | 589  | Expressions or Opinion |                        |
| 1221192328552920000 | 25-Jan-20 | 200  | 143  | General Information    |                        |
| 1221192163423400000 | 25-Jan-20 | 223  | 102  | General Information    |                        |
| 1221186855300780000 | 25-Jan-20 | 231  | 160  | General Information    |                        |
| 1221186656339770000 | 25-Jan-20 | 2159 | 1035 | General Information    |                        |
| 1221185261247380000 | 25-Jan-20 | 717  | 172  | General Information    |                        |
| 1221184288877470000 | 25-Jan-20 | 829  | 226  | Expressions or Opinion |                        |
| 1221184089669230000 | 25-Jan-20 | 433  | 446  | General Information    |                        |
| 1221183716459860000 | 25-Jan-20 | 269  | 276  | Expressions or Opinion |                        |
| 1221183300187900000 | 25-Jan-20 | 1231 | 676  | General Information    | Expressions or Opinion |
| 1221182509355970000 | 25-Jan-20 | 826  | 1060 | Health Information     |                        |
| 1221181708357320000 | 25-Jan-20 | 5562 | 838  | Sarcasm or Humour      |                        |
| 1221180700948380000 | 25-Jan-20 | 221  | 157  | General Information    |                        |
| 1221179649167890000 | 25-Jan-20 | 524  | 517  | Expressions or Opinion |                        |
| 1221175912818820000 | 25-Jan-20 | 223  | 142  | General Information    |                        |
| 1221175342028580000 | 25-Jan-20 | 1107 | 209  | Others                 |                        |
| 1221173589925400000 | 25-Jan-20 | 441  | 239  | General Information    |                        |
| 1221173122319150000 | 25-Jan-20 | 300  | 270  | General Information    |                        |
| 1221171807547480000 | 25-Jan-20 | 1504 | 1129 | Health Information     |                        |
| 1221171955660920000 | 25-Jan-20 | 81   | 139  | Health Information     |                        |
| 1221169747053640000 | 25-Jan-20 | 1717 | 1301 | Health Information     |                        |
| 1218252929515290000 | 17-Jan-20 | 206  | 87   | Health Information     | General Information    |
| 1218548114950440000 | 18-Jan-20 | 154  | 97   | Others                 |                        |
| 1218527121691360000 | 18-Jan-20 | 126  | 54   | Health Information     |                        |
| 1218544596076060000 | 18-Jan-20 | 116  | 100  | Expressions or Opinion | General Information    |
| 1218508597379780000 | 18-Jan-20 | 118  | 33   | Health Information     | General Information    |
| 1218494863907220000 | 18-Jan-20 | 133  | 2    | General Information    |                        |
| 1218361217669920000 | 18-Jan-20 | 168  | 40   | Sarcasm or Humour      |                        |
| 1219031096110800000 | 19-Jan-20 | 147  | 84   | General Information    |                        |
| 1219030527983910000 | 19-Jan-20 | 137  | 79   | Health Information     | General Information    |
| 1219030216057760000 | 19-Jan-20 | 119  | 59   | Health Information     |                        |
| 1218987668043910000 | 19-Jan-20 | 130  | 96   | General Information    |                        |
| 1218889783046520000 | 19-Jan-20 | 144  | 33   | General Information    |                        |
| 1218711058266770000 | 19-Jan-20 | 102  | 36   | General Information    | Health Information     |

|                     |           |     |     |                        |                        |
|---------------------|-----------|-----|-----|------------------------|------------------------|
| 1218890507142590000 | 19-Jan-20 | 122 | 58  | Expressions or Opinion |                        |
| 1218883847405870000 | 19-Jan-20 | 113 | 75  | General Information    | Expressions or Opinion |
| 1218785934122020000 | 19-Jan-20 | 112 | 88  | General Information    |                        |
| 1218761280368140000 | 19-Jan-20 | 103 | 49  | General Information    |                        |
| 1219377833283400000 | 20-Jan-20 | 154 | 83  | General Information    |                        |
| 1219337179735810000 | 20-Jan-20 | 109 | 76  | General Information    |                        |
| 1219398142472410000 | 20-Jan-20 | 121 | 36  | General Information    |                        |
| 1219393142534930000 | 20-Jan-20 | 229 | 55  | Expressions or Opinion |                        |
| 1219392203769830000 | 20-Jan-20 | 151 | 52  | General Information    |                        |
| 1219381236738780000 | 20-Jan-20 | 118 | 54  | General Information    |                        |
| 1219380667802210000 | 20-Jan-20 | 206 | 56  | General Information    |                        |
| 1219380047385120000 | 20-Jan-20 | 123 | 40  | Others                 |                        |
| 1219379537848320000 | 20-Jan-20 | 109 | 48  | General Information    |                        |
| 1219369353952440000 | 20-Jan-20 | 125 | 67  | General Information    |                        |
| 1219357791145590000 | 20-Jan-20 | 169 | 36  | Expressions or Opinion |                        |
| 1219347553520690000 | 20-Jan-20 | 103 | 24  | Sarcasm or Humour      |                        |
| 1219348721584020000 | 20-Jan-20 | 425 | 68  | General Information    |                        |
| 1219344456220110000 | 20-Jan-20 | 103 | 6   | Health Information     |                        |
| 1219339373096790000 | 20-Jan-20 | 124 | 50  | Expressions or Opinion |                        |
| 1219342803500550000 | 20-Jan-20 | 111 | 17  | General Information    |                        |
| 1219343772691100000 | 20-Jan-20 | 181 | 72  | Expressions or Opinion |                        |
| 1219343502582130000 | 20-Jan-20 | 120 | 100 | General Information    |                        |
| 1219331704004980000 | 20-Jan-20 | 109 | 8   | Health Information     |                        |
| 1219331271295480000 | 20-Jan-20 | 144 | 26  | General Information    |                        |
| 1219327131093580000 | 20-Jan-20 | 120 | 83  | General Information    |                        |
| 1219326199811510000 | 20-Jan-20 | 515 | 29  | General Information    |                        |
| 1219319787970530000 | 20-Jan-20 | 116 | 78  | Expressions or Opinion |                        |
| 1219771586154130000 | 21-Jan-20 | 379 | 90  | Expressions or Opinion |                        |
| 1219707353940910000 | 21-Jan-20 | 378 | 69  | Health Information     |                        |
| 1219701032827090000 | 21-Jan-20 | 157 | 95  | Health Information     | Expressions or Opinion |
| 1219763929297110000 | 21-Jan-20 | 147 | 63  | General Information    |                        |
| 1219763561716680000 | 21-Jan-20 | 124 | 13  | General Information    |                        |
| 1219762082674950000 | 21-Jan-20 | 278 | 63  | General Information    |                        |
| 1219761200420080000 | 21-Jan-20 | 326 | 85  | Health Information     |                        |
| 1219757442009000000 | 21-Jan-20 | 350 | 32  | General Information    |                        |
| 1219756924524090000 | 21-Jan-20 | 127 | 47  | Others                 |                        |
| 1219756134329990000 | 21-Jan-20 | 365 | 79  | Health Information     |                        |
| 1219754957014030000 | 21-Jan-20 | 110 | 12  | General Information    |                        |
| 1219753255753930000 | 21-Jan-20 | 449 | 40  | Health Information     |                        |
| 1219747566801290000 | 21-Jan-20 | 278 | 4   | Others                 |                        |
| 1219752977516360000 | 21-Jan-20 | 107 | 41  | Others                 |                        |
| 1219708428706250000 | 21-Jan-20 | 184 | 93  | Sarcasm or Humour      |                        |
| 1219751500156550000 | 21-Jan-20 | 103 | 18  | General Information    |                        |
| 1219749983324230000 | 21-Jan-20 | 714 | 28  | Expressions or Opinion |                        |
| 1219747294980990000 | 21-Jan-20 | 124 | 71  | Others                 |                        |
| 1219746817258190000 | 21-Jan-20 | 159 | 8   | General Information    |                        |
| 1219698455188240000 | 21-Jan-20 | 118 | 4   | Others                 |                        |

|                     |           |      |    |                        |                        |
|---------------------|-----------|------|----|------------------------|------------------------|
| 1219746204189430000 | 21-Jan-20 | 496  | 48 | Sarcasm or Humour      |                        |
| 1219744854261010000 | 21-Jan-20 | 236  | 71 | Health Information     |                        |
| 1219743847414200000 | 21-Jan-20 | 103  | 90 | Sarcasm or Humour      |                        |
| 1219742534857110000 | 21-Jan-20 | 141  | 69 | General Information    |                        |
| 1219741764057090000 | 21-Jan-20 | 692  | 94 | Sarcasm or Humour      |                        |
| 1219741119757590000 | 21-Jan-20 | 414  | 92 | Others                 |                        |
| 1219741108256760000 | 21-Jan-20 | 162  | 98 | Others                 |                        |
| 1219740537059590000 | 21-Jan-20 | 132  | 47 | General Information    |                        |
| 1219706905427360000 | 21-Jan-20 | 159  | 51 | General Information    |                        |
| 1219739222518770000 | 21-Jan-20 | 104  | 98 | General Information    |                        |
| 1219737221617470000 | 21-Jan-20 | 3660 | 35 | General Information    |                        |
| 1219697594995280000 | 21-Jan-20 | 161  | 88 | Others                 |                        |
| 1219735656659850000 | 21-Jan-20 | 132  | 21 | General Information    |                        |
| 1219733733508550000 | 21-Jan-20 | 357  | 20 | Others                 |                        |
| 1219733715909320000 | 21-Jan-20 | 121  | 30 | Sarcasm or Humour      |                        |
| 1219732370573740000 | 21-Jan-20 | 122  | 8  | Expressions or Opinion |                        |
| 1219731869060620000 | 21-Jan-20 | 129  | 79 | Expressions or Opinion | General Information    |
| 1219691006653880000 | 21-Jan-20 | 108  | 74 | General Information    | Expressions or Opinion |
| 1219702154979690000 | 21-Jan-20 | 123  | 72 | General Information    |                        |
| 1219731692581260000 | 21-Jan-20 | 250  | 21 | General Information    |                        |
| 1219731374200040000 | 21-Jan-20 | 307  | 89 | Others                 |                        |
| 1219730797487360000 | 21-Jan-20 | 1036 | 63 | Expressions or Opinion |                        |
| 1219730136372840000 | 21-Jan-20 | 160  | 34 | Others                 |                        |
| 1219728370247720000 | 21-Jan-20 | 132  | 8  | Sarcasm or Humour      | Expressions or Opinion |
| 1219728244657670000 | 21-Jan-20 | 113  | 24 | Others                 |                        |
| 1219728036205150000 | 21-Jan-20 | 144  | 15 | Health Information     |                        |
| 1219726784633160000 | 21-Jan-20 | 109  | 76 | Health Information     |                        |
| 1219725361296170000 | 21-Jan-20 | 375  | 80 | General Information    |                        |
| 1219720169016250000 | 21-Jan-20 | 174  | 3  | General Information    |                        |
| 1219693669177070000 | 21-Jan-20 | 236  | 97 | Sarcasm or Humour      |                        |
| 1219716287208860000 | 21-Jan-20 | 205  | 15 | General Information    |                        |
| 1219716166496600000 | 21-Jan-20 | 448  | 57 | Others                 |                        |
| 1219716015946370000 | 21-Jan-20 | 119  | 60 | Expressions or Opinion |                        |
| 1219715924594260000 | 21-Jan-20 | 195  | 51 | Expressions or Opinion |                        |
| 1219714534111370000 | 21-Jan-20 | 111  | 95 | Others                 |                        |
| 1219714448081810000 | 21-Jan-20 | 961  | 76 | General Information    |                        |
| 1219709508773170000 | 21-Jan-20 | 253  | 30 | Expressions or Opinion |                        |
| 1219696087415550000 | 21-Jan-20 | 392  | 76 | Sarcasm or Humour      |                        |
| 1219705002244960000 | 21-Jan-20 | 127  | 10 | Expressions or Opinion |                        |
| 1219704523628970000 | 21-Jan-20 | 137  | 16 | Expressions or Opinion |                        |
| 1219703537266870000 | 21-Jan-20 | 133  | 28 | General Information    |                        |
| 1219689390181510000 | 21-Jan-20 | 107  | 63 | Health Information     | Sarcasm or Humour      |
| 1219702633960810000 | 21-Jan-20 | 224  | 3  | General Information    |                        |
| 1219698850841210000 | 21-Jan-20 | 107  | 19 | Expressions or Opinion |                        |
| 1219701106567040000 | 21-Jan-20 | 187  | 32 | General Information    |                        |
| 1219701067535000000 | 21-Jan-20 | 231  | 28 | General Information    |                        |
| 1219700225465600000 | 21-Jan-20 | 186  | 2  | General Information    |                        |

|                     |           |     |    |                        |                     |
|---------------------|-----------|-----|----|------------------------|---------------------|
| 1219699233240100000 | 21-Jan-20 | 107 | 18 | Others                 |                     |
| 1219697830929010000 | 21-Jan-20 | 113 | 42 | Expressions or Opinion |                     |
| 1219697702340050000 | 21-Jan-20 | 182 | 11 | General Information    |                     |
| 1219697196829790000 | 21-Jan-20 | 129 | 6  | Expressions or Opinion |                     |
| 1219695447616260000 | 21-Jan-20 | 277 | 79 | Others                 |                     |
| 1219695048889130000 | 21-Jan-20 | 123 | 34 | Others                 |                     |
| 1219695003330620000 | 21-Jan-20 | 126 | 19 | Others                 |                     |
| 1219693015058590000 | 21-Jan-20 | 130 | 30 | Sarcasm or Humour      |                     |
| 1219689971277100000 | 21-Jan-20 | 102 | 54 | General Information    |                     |
| 1219689259310820000 | 21-Jan-20 | 157 | 59 | Health Information     | General Information |
| 1219687250293730000 | 21-Jan-20 | 166 | 80 | General Information    |                     |
| 1219687242425360000 | 21-Jan-20 | 104 | 7  | Health Information     |                     |
| 1220125521985460000 | 22-Jan-20 | 107 | 52 | General Information    |                     |
| 1220132455765590000 | 22-Jan-20 | 149 | 33 | General Information    |                     |
| 1220097011225160000 | 22-Jan-20 | 112 | 52 | Expressions or Opinion |                     |
| 1220130092078240000 | 22-Jan-20 | 190 | 11 | General Information    |                     |
| 1220131565990260000 | 22-Jan-20 | 140 | 17 | Sarcasm or Humour      |                     |
| 1220077488468080000 | 22-Jan-20 | 272 | 77 | Expressions or Opinion |                     |
| 1220130225490660000 | 22-Jan-20 | 111 | 81 | Expressions or Opinion |                     |
| 1220130183900000000 | 22-Jan-20 | 488 | 53 | General Information    |                     |
| 1220129957034130000 | 22-Jan-20 | 200 | 43 | Expressions or Opinion |                     |
| 1220081464521490000 | 22-Jan-20 | 211 | 87 | Expressions or Opinion |                     |
| 1220128306298830000 | 22-Jan-20 | 625 | 84 | Sarcasm or Humour      | General Information |
| 1220127757935540000 | 22-Jan-20 | 114 | 90 | General Information    |                     |
| 1220126006360580000 | 22-Jan-20 | 192 | 32 | General Information    |                     |
| 1220125862680390000 | 22-Jan-20 | 257 | 51 | Expressions or Opinion |                     |
| 1220072277582040000 | 22-Jan-20 | 136 | 73 | Expressions or Opinion |                     |
| 1220044378162500000 | 22-Jan-20 | 162 | 89 | General Information    |                     |
| 1220124285932430000 | 22-Jan-20 | 102 | 59 | Expressions or Opinion |                     |
| 1220123185687010000 | 22-Jan-20 | 118 | 27 | General Information    |                     |
| 1220080348668800000 | 22-Jan-20 | 138 | 20 | Expressions or Opinion |                     |
| 1220122801325190000 | 22-Jan-20 | 110 | 40 | Expressions or Opinion |                     |
| 1220121186820030000 | 22-Jan-20 | 292 | 85 | General Information    |                     |
| 1220120526246630000 | 22-Jan-20 | 174 | 13 | Expressions or Opinion |                     |
| 1220120293232070000 | 22-Jan-20 | 127 | 79 | Others                 |                     |
| 1220079305520100000 | 22-Jan-20 | 201 | 35 | General Information    |                     |
| 1220119727827230000 | 22-Jan-20 | 137 | 89 | Expressions or Opinion |                     |
| 1220108498840640000 | 22-Jan-20 | 162 | 30 | General Information    |                     |
| 1220107349114960000 | 22-Jan-20 | 122 | 24 | General Information    |                     |
| 1220107341959480000 | 22-Jan-20 | 180 | 9  | Expressions or Opinion |                     |
| 1220107224493610000 | 22-Jan-20 | 168 | 17 | Expressions or Opinion |                     |
| 1220106420156330000 | 22-Jan-20 | 103 | 87 | General Information    |                     |
| 1220101978623220000 | 22-Jan-20 | 226 | 82 | General Information    |                     |
| 1220101833890430000 | 22-Jan-20 | 209 | 69 | Expressions or Opinion |                     |
| 1220057052896280000 | 22-Jan-20 | 103 | 96 | General Information    |                     |
| 1220101747693080000 | 22-Jan-20 | 232 | 39 | Health Information     |                     |
| 1220101736758680000 | 22-Jan-20 | 217 | 99 | Expressions or Opinion |                     |

|                     |           |     |     |                        |                        |
|---------------------|-----------|-----|-----|------------------------|------------------------|
| 1220101106245570000 | 22-Jan-20 | 159 | 84  | General Information    |                        |
| 1220094589857670000 | 22-Jan-20 | 128 | 86  | General Information    |                        |
| 1220099881961810000 | 22-Jan-20 | 183 | 90  | General Information    | Expressions or Opinion |
| 1220097417741130000 | 22-Jan-20 | 258 | 33  | General Information    |                        |
| 1220097239487580000 | 22-Jan-20 | 123 | 53  | Others                 |                        |
| 1220096803304950000 | 22-Jan-20 | 225 | 22  | General Information    |                        |
| 1220094779049950000 | 22-Jan-20 | 259 | 27  | Expressions or Opinion |                        |
| 1220094355022730000 | 22-Jan-20 | 104 | 10  | General Information    |                        |
| 1220093441746650000 | 22-Jan-20 | 174 | 49  | Others                 |                        |
| 1220093131313550000 | 22-Jan-20 | 177 | 21  | Others                 |                        |
| 1220092811015400000 | 22-Jan-20 | 160 | 35  | Expressions or Opinion |                        |
| 1220091638560830000 | 22-Jan-20 | 113 | 21  | Expressions or Opinion |                        |
| 1220089025509380000 | 22-Jan-20 | 119 | 80  | General Information    | Sarcasm or Humour      |
| 1220073423134690000 | 22-Jan-20 | 122 | 90  | General Information    |                        |
| 1220038445709640000 | 22-Jan-20 | 101 | 26  | General Information    |                        |
| 1220088916369440000 | 22-Jan-20 | 124 | 23  | General Information    |                        |
| 1220043810438250000 | 22-Jan-20 | 152 | 56  | Expressions or Opinion | General Information    |
| 1220085207367390000 | 22-Jan-20 | 147 | 91  | General Information    |                        |
| 1220086982254060000 | 22-Jan-20 | 202 | 50  | General Information    |                        |
| 1220072844186570000 | 22-Jan-20 | 128 | 52  | Expressions or Opinion |                        |
| 1220072354300210000 | 22-Jan-20 | 180 | 100 | Others                 |                        |
| 1220072074892410000 | 22-Jan-20 | 219 | 89  | Expressions or Opinion |                        |
| 1220072233214840000 | 22-Jan-20 | 210 | 79  | Expressions or Opinion |                        |
| 1220084247421180000 | 22-Jan-20 | 120 | 55  | Expressions or Opinion |                        |
| 1220083834265500000 | 22-Jan-20 | 111 | 32  | Expressions or Opinion |                        |
| 1220077268124470000 | 22-Jan-20 | 149 | 25  | General Information    |                        |
| 1220082004064190000 | 22-Jan-20 | 774 | 94  | Sarcasm or Humour      |                        |
| 1220081804742480000 | 22-Jan-20 | 101 | 50  | Expressions or Opinion |                        |
| 1220078902208540000 | 22-Jan-20 | 136 | 36  | General Information    |                        |
| 1220079901014920000 | 22-Jan-20 | 153 | 55  | Expressions or Opinion | General Information    |
| 1220078993359230000 | 22-Jan-20 | 205 | 39  | General Information    |                        |
| 1220078394387450000 | 22-Jan-20 | 103 | 85  | General Information    |                        |
| 1220077865833760000 | 22-Jan-20 | 141 | 15  | General Information    |                        |
| 1220077234658030000 | 22-Jan-20 | 146 | 43  | Others                 |                        |
| 1220056640029880000 | 22-Jan-20 | 128 | 20  | General Information    |                        |
| 1220073476201100000 | 22-Jan-20 | 130 | 54  | Expressions or Opinion |                        |
| 1220072864600080000 | 22-Jan-20 | 122 | 97  | Health Information     | General Information    |
| 1220072147969870000 | 22-Jan-20 | 402 | 23  | General Information    |                        |
| 1220042684473140000 | 22-Jan-20 | 218 | 33  | Others                 |                        |
| 1220069873310540000 | 22-Jan-20 | 187 | 32  | Expressions or Opinion |                        |
| 1220069657538890000 | 22-Jan-20 | 123 | 52  | General Information    |                        |
| 1220069629172860000 | 22-Jan-20 | 122 | 96  | General Information    |                        |
| 1220069371856530000 | 22-Jan-20 | 102 | 63  | General Information    |                        |
| 1220068539970850000 | 22-Jan-20 | 391 | 81  | General Information    |                        |
| 1220067698614460000 | 22-Jan-20 | 240 | 9   | Expressions or Opinion |                        |
| 1220064990046100000 | 22-Jan-20 | 102 | 22  | General Information    |                        |
| 1220063643456430000 | 22-Jan-20 | 130 | 14  | Others                 |                        |

|                     |           |     |    |                        |                        |
|---------------------|-----------|-----|----|------------------------|------------------------|
| 1220063187434900000 | 22-Jan-20 | 130 | 24 | Sarcasm or Humour      |                        |
| 1220062751344810000 | 22-Jan-20 | 140 | 15 | Others                 |                        |
| 1220061018614830000 | 22-Jan-20 | 391 | 65 | General Information    |                        |
| 1220060045645360000 | 22-Jan-20 | 132 | 37 | General Information    |                        |
| 1220055566829010000 | 22-Jan-20 | 104 | 61 | Sarcasm or Humour      |                        |
| 1220058545414110000 | 22-Jan-20 | 118 | 33 | Expressions or Opinion | General Information    |
| 1220055192370140000 | 22-Jan-20 | 195 | 41 | General Information    |                        |
| 1220046190160400000 | 22-Jan-20 | 211 | 96 | Sarcasm or Humour      |                        |
| 1220039416787260000 | 22-Jan-20 | 226 | 5  | Health Information     |                        |
| 1220039383232860000 | 22-Jan-20 | 114 | 32 | Expressions or Opinion |                        |
| 1220450915028810000 | 23-Jan-20 | 118 | 93 | Expressions or Opinion | General Information    |
| 1220495052159530000 | 23-Jan-20 | 108 | 11 | General Information    |                        |
| 1220494423047460000 | 23-Jan-20 | 180 | 38 | Expressions or Opinion | General Information    |
| 1220439160277950000 | 23-Jan-20 | 151 | 95 | Others                 |                        |
| 1220493219215130000 | 23-Jan-20 | 144 | 81 | Health Information     |                        |
| 1220493443186800000 | 23-Jan-20 | 243 | 46 | General Information    |                        |
| 1220493415365950000 | 23-Jan-20 | 131 | 38 | General Information    |                        |
| 1220488400886610000 | 23-Jan-20 | 102 | 51 | General Information    |                        |
| 1220436039204060000 | 23-Jan-20 | 279 | 98 | General Information    |                        |
| 1220469924755310000 | 23-Jan-20 | 212 | 49 | Expressions or Opinion |                        |
| 1220489829382750000 | 23-Jan-20 | 159 | 31 | General Information    |                        |
| 1220489348812090000 | 23-Jan-20 | 409 | 23 | Others                 |                        |
| 1220459623075010000 | 23-Jan-20 | 107 | 89 | Expressions or Opinion |                        |
| 1220488812188560000 | 23-Jan-20 | 283 | 21 | General Information    |                        |
| 1220487332601740000 | 23-Jan-20 | 538 | 92 | Sarcasm or Humour      |                        |
| 1220486000675370000 | 23-Jan-20 | 242 | 18 | General Information    |                        |
| 1220478935504420000 | 23-Jan-20 | 892 | 84 | Others                 |                        |
| 1220485901291280000 | 23-Jan-20 | 113 | 1  | General Information    |                        |
| 1220485736090100000 | 23-Jan-20 | 104 | 72 | Expressions or Opinion |                        |
| 1220485641512850000 | 23-Jan-20 | 141 | 35 | General Information    |                        |
| 1220485595719290000 | 23-Jan-20 | 610 | 79 | General Information    |                        |
| 1220484927705270000 | 23-Jan-20 | 170 | 21 | Sarcasm or Humour      | Expressions or Opinion |
| 1220484696997530000 | 23-Jan-20 | 198 | 23 | Sarcasm or Humour      |                        |
| 1220483115459670000 | 23-Jan-20 | 254 | 97 | Others                 |                        |
| 1220449797234200000 | 23-Jan-20 | 511 | 26 | Expressions or Opinion |                        |
| 1220482592883000000 | 23-Jan-20 | 160 | 28 | Expressions or Opinion |                        |
| 1220481885769530000 | 23-Jan-20 | 155 | 80 | Expressions or Opinion | General Information    |
| 1220443589802690000 | 23-Jan-20 | 118 | 72 | General Information    |                        |
| 1220481194040680000 | 23-Jan-20 | 105 | 82 | General Information    |                        |
| 1220479654563400000 | 23-Jan-20 | 189 | 77 | General Information    |                        |
| 1220478746127410000 | 23-Jan-20 | 313 | 13 | General Information    |                        |
| 1220478647112470000 | 23-Jan-20 | 370 | 61 | Others                 |                        |
| 1220451490466350000 | 23-Jan-20 | 135 | 94 | Expressions or Opinion |                        |
| 1220475371751180000 | 23-Jan-20 | 107 | 72 | General Information    |                        |
| 1220473912187890000 | 23-Jan-20 | 118 | 98 | Sarcasm or Humour      | General Information    |
| 1220476003438420000 | 23-Jan-20 | 170 | 9  | Others                 |                        |
| 1220475239986940000 | 23-Jan-20 | 194 | 66 | Expressions or Opinion | General Information    |

|                     |           |     |    |                        |                        |
|---------------------|-----------|-----|----|------------------------|------------------------|
| 1220473377489630000 | 23-Jan-20 | 117 | 91 | Health Information     | General Information    |
| 1220433276894080000 | 23-Jan-20 | 151 | 94 | General Information    |                        |
| 1220464833415600000 | 23-Jan-20 | 132 | 16 | General Information    |                        |
| 1220463839931780000 | 23-Jan-20 | 108 | 13 | General Information    |                        |
| 1220464497548310000 | 23-Jan-20 | 164 | 34 | General Information    |                        |
| 1220464120396420000 | 23-Jan-20 | 362 | 28 | Others                 |                        |
| 1220463635870420000 | 23-Jan-20 | 313 | 34 | Expressions or Opinion |                        |
| 1220462514296760000 | 23-Jan-20 | 144 | 32 | Expressions or Opinion |                        |
| 1220462468943750000 | 23-Jan-20 | 125 | 28 | Health Information     |                        |
| 1220461995775970000 | 23-Jan-20 | 264 | 36 | General Information    |                        |
| 1220461941723990000 | 23-Jan-20 | 198 | 35 | Sarcasm or Humour      |                        |
| 1220461834056210000 | 23-Jan-20 | 393 | 69 | Sarcasm or Humour      |                        |
| 1220459752104380000 | 23-Jan-20 | 107 | 15 | Others                 |                        |
| 1220458942192670000 | 23-Jan-20 | 133 | 24 | General Information    |                        |
| 1220458752916230000 | 23-Jan-20 | 117 | 71 | General Information    |                        |
| 1220458592354090000 | 23-Jan-20 | 124 | 19 | Expressions or Opinion |                        |
| 1220454865413060000 | 23-Jan-20 | 103 | 66 | General Information    | Expressions or Opinion |
| 1220457368842130000 | 23-Jan-20 | 160 | 16 | Others                 |                        |
| 1220456610218280000 | 23-Jan-20 | 161 | 41 | Health Information     |                        |
| 1220451621236360000 | 23-Jan-20 | 124 | 95 | General Information    |                        |
| 1220456677285160000 | 23-Jan-20 | 165 | 44 | Health Information     |                        |
| 1220456425022980000 | 23-Jan-20 | 107 | 13 | Expressions or Opinion |                        |
| 1220455798645620000 | 23-Jan-20 | 148 | 80 | General Information    |                        |
| 1220455368318420000 | 23-Jan-20 | 120 | 80 | Health Information     | General Information    |
| 1220454612471360000 | 23-Jan-20 | 128 | 32 | Expressions or Opinion |                        |
| 1220452829602700000 | 23-Jan-20 | 133 | 66 | General Information    |                        |
| 1220453884537240000 | 23-Jan-20 | 206 | 27 | Health Information     |                        |
| 1220438842152550000 | 23-Jan-20 | 145 | 90 | General Information    |                        |
| 1220451423147770000 | 23-Jan-20 | 169 | 76 | General Information    |                        |
| 1220451386405550000 | 23-Jan-20 | 189 | 50 | Others                 |                        |
| 1220450436811010000 | 23-Jan-20 | 154 | 44 | Sarcasm or Humour      |                        |
| 1220450205247680000 | 23-Jan-20 | 186 | 15 | Expressions or Opinion |                        |
| 1220448115393810000 | 23-Jan-20 | 127 | 72 | General Information    |                        |
| 1220445234280250000 | 23-Jan-20 | 122 | 30 | General Information    |                        |
| 1220444490026090000 | 23-Jan-20 | 109 | 37 | Health Information     | General Information    |
| 1220443793389800000 | 23-Jan-20 | 151 | 69 | General Information    |                        |
| 1220441790773440000 | 23-Jan-20 | 599 | 63 | Expressions or Opinion |                        |
| 1220441706635630000 | 23-Jan-20 | 150 | 28 | Sarcasm or Humour      |                        |
| 1220439709698210000 | 23-Jan-20 | 159 | 40 | Expressions or Opinion |                        |
| 1220439672771500000 | 23-Jan-20 | 168 | 12 | Expressions or Opinion |                        |
| 1220439667604180000 | 23-Jan-20 | 109 | 30 | General Information    |                        |
| 1220439551849710000 | 23-Jan-20 | 337 | 34 | Others                 |                        |
| 1220438920141380000 | 23-Jan-20 | 136 | 14 | Expressions or Opinion |                        |
| 1220438378451290000 | 23-Jan-20 | 323 | 83 | Sarcasm or Humour      |                        |
| 1220437361575840000 | 23-Jan-20 | 163 | 29 | General Information    |                        |
| 1220436247086320000 | 23-Jan-20 | 154 | 76 | General Information    | Expressions or Opinion |
| 1220433190919310000 | 23-Jan-20 | 239 | 13 | Others                 |                        |

|                     |           |     |     |                        |                        |
|---------------------|-----------|-----|-----|------------------------|------------------------|
| 1220431970297170000 | 23-Jan-20 | 117 | 51  | General Information    | Expressions or Opinion |
| 1220431955755400000 | 23-Jan-20 | 125 | 56  | General Information    | Expressions or Opinion |
| 1220430457583620000 | 23-Jan-20 | 103 | 6   | Others                 |                        |
| 1220429129516020000 | 23-Jan-20 | 161 | 47  | Sarcasm or Humour      |                        |
| 1220429002768310000 | 23-Jan-20 | 108 | 9   | Sarcasm or Humour      |                        |
| 1220428356606440000 | 23-Jan-20 | 242 | 51  | Sarcasm or Humour      |                        |
| 1220428309613490000 | 23-Jan-20 | 179 | 7   | Others                 |                        |
| 1220824171292310000 | 24-Jan-20 | 115 | 63  | General Information    |                        |
| 1220858315988780000 | 24-Jan-20 | 209 | 32  | Health Information     | General Information    |
| 122085566665050000  | 24-Jan-20 | 282 | 40  | Expressions or Opinion |                        |
| 1220858203778530000 | 24-Jan-20 | 166 | 58  | Expressions or Opinion |                        |
| 1220805247557420000 | 24-Jan-20 | 115 | 75  | General Information    |                        |
| 1220851271948800000 | 24-Jan-20 | 104 | 85  | General Information    |                        |
| 1220857166862700000 | 24-Jan-20 | 131 | 16  | Others                 |                        |
| 1220825706801890000 | 24-Jan-20 | 117 | 59  | Expressions or Opinion |                        |
| 1220842103170900000 | 24-Jan-20 | 173 | 100 | General Information    |                        |
| 1220851391268360000 | 24-Jan-20 | 156 | 95  | General Information    |                        |
| 1220856377993610000 | 24-Jan-20 | 151 | 39  | Expressions or Opinion |                        |
| 1220807271216630000 | 24-Jan-20 | 104 | 27  | General Information    |                        |
| 1220814656304030000 | 24-Jan-20 | 112 | 51  | General Information    |                        |
| 1220854958200720000 | 24-Jan-20 | 180 | 24  | Expressions or Opinion | General Information    |
| 1220854016802000000 | 24-Jan-20 | 361 | 18  | Health Information     |                        |
| 1220813523200230000 | 24-Jan-20 | 318 | 99  | General Information    |                        |
| 1220853788518410000 | 24-Jan-20 | 135 | 55  | Expressions or Opinion |                        |
| 1220852680849060000 | 24-Jan-20 | 112 | 7   | Expressions or Opinion |                        |
| 1220851312553750000 | 24-Jan-20 | 419 | 78  | General Information    |                        |
| 1220851271999150000 | 24-Jan-20 | 109 | 31  | General Information    |                        |
| 1220850544605970000 | 24-Jan-20 | 131 | 88  | Expressions or Opinion | General Information    |
| 1220848717743280000 | 24-Jan-20 | 130 | 57  | Expressions or Opinion |                        |
| 1220848478961660000 | 24-Jan-20 | 107 | 59  | General Information    |                        |
| 1220848366231470000 | 24-Jan-20 | 120 | 100 | General Information    |                        |
| 1220830757670860000 | 24-Jan-20 | 380 | 65  | Sarcasm or Humour      |                        |
| 1220847529119450000 | 24-Jan-20 | 107 | 3   | Sarcasm or Humour      |                        |
| 1220847475562380000 | 24-Jan-20 | 298 | 19  | Expressions or Opinion |                        |
| 1220847362450630000 | 24-Jan-20 | 158 | 98  | General Information    |                        |
| 1220828939347800000 | 24-Jan-20 | 153 | 85  | General Information    |                        |
| 1220843825305810000 | 24-Jan-20 | 106 | 27  | General Information    |                        |
| 1220830800444340000 | 24-Jan-20 | 160 | 29  | Expressions or Opinion |                        |
| 1220832804310780000 | 24-Jan-20 | 351 | 38  | Expressions or Opinion |                        |
| 1220846026531070000 | 24-Jan-20 | 107 | 10  | Expressions or Opinion |                        |
| 1220844652875690000 | 24-Jan-20 | 133 | 18  | Expressions or Opinion |                        |
| 1220828237657520000 | 24-Jan-20 | 113 | 77  | General Information    | Expressions or Opinion |
| 1220820645258410000 | 24-Jan-20 | 114 | 68  | General Information    |                        |
| 1220843777813880000 | 24-Jan-20 | 268 | 50  | General Information    |                        |
| 1220843511639160000 | 24-Jan-20 | 272 | 73  | Health Information     |                        |
| 1220816257223660000 | 24-Jan-20 | 107 | 28  | Sarcasm or Humour      |                        |
| 1220843121799580000 | 24-Jan-20 | 233 | 8   | Others                 |                        |

|                     |           |      |    |                        |                        |
|---------------------|-----------|------|----|------------------------|------------------------|
| 1220842827648830000 | 24-Jan-20 | 189  | 24 | Expressions or Opinion |                        |
| 1220842438295720000 | 24-Jan-20 | 329  | 69 | Sarcasm or Humour      |                        |
| 1220841835494600000 | 24-Jan-20 | 511  | 36 | Expressions or Opinion |                        |
| 1220841369792580000 | 24-Jan-20 | 501  | 60 | Health Information     |                        |
| 1220841281095720000 | 24-Jan-20 | 113  | 0  | Others                 |                        |
| 1220840801594270000 | 24-Jan-20 | 1843 | 66 | Expressions or Opinion |                        |
| 1220840133999510000 | 24-Jan-20 | 205  | 69 | General Information    |                        |
| 1220823669276110000 | 24-Jan-20 | 245  | 5  | Sarcasm or Humour      |                        |
| 1220839229808390000 | 24-Jan-20 | 452  | 77 | Expressions or Opinion |                        |
| 1220838551799170000 | 24-Jan-20 | 229  | 3  | Expressions or Opinion |                        |
| 1220813947567100000 | 24-Jan-20 | 290  | 20 | Health Information     |                        |
| 1220811504360060000 | 24-Jan-20 | 126  | 56 | General Information    |                        |
| 1220837108568480000 | 24-Jan-20 | 176  | 38 | Others                 |                        |
| 1220836709069240000 | 24-Jan-20 | 268  | 30 | General Information    |                        |
| 1220836457050460000 | 24-Jan-20 | 950  | 92 | General Information    |                        |
| 1220835972092440000 | 24-Jan-20 | 213  | 39 | Expressions or Opinion | General Information    |
| 1220835682828120000 | 24-Jan-20 | 122  | 34 | Expressions or Opinion |                        |
| 1220835680432950000 | 24-Jan-20 | 177  | 3  | Health Information     |                        |
| 1220835648489290000 | 24-Jan-20 | 118  | 6  | Others                 |                        |
| 1220834411442160000 | 24-Jan-20 | 359  | 31 | Expressions or Opinion |                        |
| 1220833438707500000 | 24-Jan-20 | 142  | 52 | Expressions or Opinion |                        |
| 1220832809792780000 | 24-Jan-20 | 223  | 71 | General Information    |                        |
| 1220832790758830000 | 24-Jan-20 | 109  | 29 | Expressions or Opinion |                        |
| 1220832774262780000 | 24-Jan-20 | 143  | 36 | Others                 |                        |
| 1220832749327670000 | 24-Jan-20 | 210  | 61 | Sarcasm or Humour      |                        |
| 1220831860277810000 | 24-Jan-20 | 354  | 14 | Expressions or Opinion |                        |
| 1220831804619440000 | 24-Jan-20 | 483  | 40 | Expressions or Opinion |                        |
| 1220831631151390000 | 24-Jan-20 | 922  | 81 | Others                 |                        |
| 1220831525920320000 | 24-Jan-20 | 120  | 30 | General Information    |                        |
| 1220831294952590000 | 24-Jan-20 | 195  | 26 | General Information    | Expressions or Opinion |
| 1220830593379770000 | 24-Jan-20 | 110  | 41 | Others                 |                        |
| 1220830459703300000 | 24-Jan-20 | 109  | 3  | Expressions or Opinion |                        |
| 1220829217245580000 | 24-Jan-20 | 153  | 10 | Others                 |                        |
| 1220828937208700000 | 24-Jan-20 | 299  | 7  | Others                 |                        |
| 1220828612443670000 | 24-Jan-20 | 144  | 61 | Expressions or Opinion |                        |
| 1220828331995810000 | 24-Jan-20 | 106  | 7  | Others                 |                        |
| 1220828221173660000 | 24-Jan-20 | 170  | 72 | General Information    |                        |
| 1220827746403850000 | 24-Jan-20 | 332  | 30 | Sarcasm or Humour      |                        |
| 1220826885673900000 | 24-Jan-20 | 437  | 46 | Expressions or Opinion |                        |
| 1220825725072070000 | 24-Jan-20 | 153  | 23 | Expressions or Opinion |                        |
| 1220825673658450000 | 24-Jan-20 | 109  | 84 | Health Information     |                        |
| 1220804542171950000 | 24-Jan-20 | 151  | 65 | General Information    |                        |
| 1220824115482970000 | 24-Jan-20 | 118  | 72 | Expressions or Opinion | General Information    |
| 1220823733222420000 | 24-Jan-20 | 119  | 66 | General Information    |                        |
| 1220822973147270000 | 24-Jan-20 | 140  | 31 | Expressions or Opinion |                        |
| 1220820405738460000 | 24-Jan-20 | 110  | 17 | Expressions or Opinion |                        |
| 1220819417346530000 | 24-Jan-20 | 527  | 65 | Expressions or Opinion |                        |

|                     |           |      |    |                        |                        |
|---------------------|-----------|------|----|------------------------|------------------------|
| 1220819251356790000 | 24-Jan-20 | 1101 | 18 | Expressions or Opinion |                        |
| 1220819053037650000 | 24-Jan-20 | 614  | 93 | Others                 |                        |
| 1220819011249800000 | 24-Jan-20 | 394  | 91 | Sarcasm or Humour      |                        |
| 1220818801165590000 | 24-Jan-20 | 114  | 87 | General Information    |                        |
| 1220818611893300000 | 24-Jan-20 | 431  | 21 | Others                 |                        |
| 1220816499134410000 | 24-Jan-20 | 117  | 87 | General Information    |                        |
| 1220817706594810000 | 24-Jan-20 | 161  | 72 | Health Information     |                        |
| 1220809016210850000 | 24-Jan-20 | 105  | 57 | Expressions or Opinion |                        |
| 1220816910041990000 | 24-Jan-20 | 346  | 64 | Expressions or Opinion |                        |
| 1220816565358280000 | 24-Jan-20 | 110  | 10 | General Information    |                        |
| 1220815908702040000 | 24-Jan-20 | 122  | 10 | Expressions or Opinion |                        |
| 1220815239127740000 | 24-Jan-20 | 228  | 71 | General Information    | Expressions or Opinion |
| 1220815240574760000 | 24-Jan-20 | 118  | 21 | General Information    |                        |
| 1220814874298710000 | 24-Jan-20 | 108  | 10 | Others                 |                        |
| 1220811988256860000 | 24-Jan-20 | 152  | 44 | General Information    |                        |
| 1220813229611500000 | 24-Jan-20 | 400  | 97 | Sarcasm or Humour      | Expressions or Opinion |
| 1220813114511320000 | 24-Jan-20 | 188  | 87 | General Information    |                        |
| 1220812482240860000 | 24-Jan-20 | 172  | 39 | General Information    |                        |
| 1220811449414510000 | 24-Jan-20 | 126  | 10 | Others                 |                        |
| 1220810250623860000 | 24-Jan-20 | 118  | 14 | Others                 |                        |
| 1220809761614060000 | 24-Jan-20 | 101  | 38 | Health Information     |                        |
| 1220808700753070000 | 24-Jan-20 | 143  | 5  | Sarcasm or Humour      |                        |
| 1220808329930420000 | 24-Jan-20 | 267  | 63 | General Information    |                        |
| 1220808159998220000 | 24-Jan-20 | 248  | 7  | Expressions or Opinion |                        |
| 1220807744065650000 | 24-Jan-20 | 751  | 45 | Others                 |                        |
| 1220806627747450000 | 24-Jan-20 | 111  | 37 | Expressions or Opinion |                        |
| 1220806078549590000 | 24-Jan-20 | 122  | 20 | Health Information     |                        |
| 1220803846106150000 | 24-Jan-20 | 114  | 36 | Expressions or Opinion |                        |
| 1221180566399300000 | 25-Jan-20 | 115  | 94 | General Information    |                        |
| 1221220876504520000 | 25-Jan-20 | 312  | 38 | Expressions or Opinion |                        |
| 1221209604975180000 | 25-Jan-20 | 164  | 25 | General Information    |                        |
| 1221220611319460000 | 25-Jan-20 | 121  | 41 | Health Information     |                        |
| 1221220586774390000 | 25-Jan-20 | 538  | 78 | Others                 |                        |
| 1221220573407150000 | 25-Jan-20 | 301  | 68 | Expressions or Opinion |                        |
| 1221220363868280000 | 25-Jan-20 | 207  | 9  | Sarcasm or Humour      |                        |
| 1221220134267830000 | 25-Jan-20 | 115  | 6  | Expressions or Opinion |                        |
| 1221220131487040000 | 25-Jan-20 | 137  | 18 | Expressions or Opinion |                        |
| 1221220097747970000 | 25-Jan-20 | 207  | 39 | Expressions or Opinion |                        |
| 1221219157422880000 | 25-Jan-20 | 233  | 42 | Health Information     |                        |
| 1221218528050790000 | 25-Jan-20 | 140  | 98 | Expressions or Opinion |                        |
| 1221215563369840000 | 25-Jan-20 | 176  | 86 | Health Information     |                        |
| 1221218730383790000 | 25-Jan-20 | 157  | 96 | General Information    |                        |
| 1221218415505030000 | 25-Jan-20 | 468  | 77 | General Information    |                        |
| 1221192591510730000 | 25-Jan-20 | 107  | 95 | Health Information     |                        |
| 1221212164393840000 | 25-Jan-20 | 131  | 4  | Others                 |                        |
| 1221202391313390000 | 25-Jan-20 | 224  | 80 | Expressions or Opinion |                        |
| 1221216075225940000 | 25-Jan-20 | 175  | 39 | General Information    |                        |

|                     |           |     |    |                        |                        |
|---------------------|-----------|-----|----|------------------------|------------------------|
| 1221215673277270000 | 25-Jan-20 | 191 | 44 | General Information    |                        |
| 1221215611566650000 | 25-Jan-20 | 193 | 78 | General Information    |                        |
| 1221215080064430000 | 25-Jan-20 | 103 | 4  | Expressions or Opinion |                        |
| 1221214560461340000 | 25-Jan-20 | 192 | 23 | Expressions or Opinion |                        |
| 1221179354354540000 | 25-Jan-20 | 130 | 71 | Health Information     |                        |
| 1221214281586360000 | 25-Jan-20 | 332 | 11 | Sarcasm or Humour      |                        |
| 1221213772561500000 | 25-Jan-20 | 344 | 94 | General Information    |                        |
| 1221213657322990000 | 25-Jan-20 | 112 | 88 | General Information    |                        |
| 1221201353906760000 | 25-Jan-20 | 150 | 82 | General Information    |                        |
| 1221206809647730000 | 25-Jan-20 | 139 | 15 | Expressions or Opinion |                        |
| 1221183924652710000 | 25-Jan-20 | 241 | 11 | Expressions or Opinion |                        |
| 1221211250253790000 | 25-Jan-20 | 322 | 24 | Expressions or Opinion |                        |
| 1221211121706760000 | 25-Jan-20 | 175 | 16 | Others                 |                        |
| 1221210964755800000 | 25-Jan-20 | 130 | 25 | Sarcasm or Humour      |                        |
| 1221210808857780000 | 25-Jan-20 | 185 | 67 | Others                 |                        |
| 1221210569513950000 | 25-Jan-20 | 117 | 2  | Sarcasm or Humour      |                        |
| 1221194347619680000 | 25-Jan-20 | 132 | 92 | General Information    |                        |
| 1221178665205190000 | 25-Jan-20 | 103 | 96 | General Information    |                        |
| 1221184505001770000 | 25-Jan-20 | 138 | 80 | General Information    |                        |
| 1221210376836190000 | 25-Jan-20 | 193 | 68 | Expressions or Opinion |                        |
| 1221210252902830000 | 25-Jan-20 | 126 | 10 | Expressions or Opinion |                        |
| 1221210115149310000 | 25-Jan-20 | 285 | 72 | Expressions or Opinion |                        |
| 1221208908749950000 | 25-Jan-20 | 157 | 42 | Expressions or Opinion |                        |
| 1221208529626910000 | 25-Jan-20 | 135 | 67 | General Information    |                        |
| 1221208221207220000 | 25-Jan-20 | 711 | 81 | Sarcasm or Humour      |                        |
| 1221207891169950000 | 25-Jan-20 | 147 | 68 | General Information    |                        |
| 1221207872148730000 | 25-Jan-20 | 114 | 12 | Expressions or Opinion |                        |
| 1221175163011630000 | 25-Jan-20 | 101 | 72 | Expressions or Opinion |                        |
| 1221206933828460000 | 25-Jan-20 | 254 | 3  | Expressions or Opinion |                        |
| 1221206144745720000 | 25-Jan-20 | 140 | 57 | Expressions or Opinion | General Information    |
| 1221205779384080000 | 25-Jan-20 | 176 | 51 | Expressions or Opinion |                        |
| 1221205364751750000 | 25-Jan-20 | 211 | 25 | General Information    |                        |
| 1221201567824660000 | 25-Jan-20 | 111 | 36 | General Information    |                        |
| 1221204999545540000 | 25-Jan-20 | 414 | 96 | Sarcasm or Humour      |                        |
| 1221204859174690000 | 25-Jan-20 | 305 | 70 | Expressions or Opinion |                        |
| 1221204796314710000 | 25-Jan-20 | 130 | 6  | Others                 |                        |
| 1221204262686010000 | 25-Jan-20 | 134 | 7  | Sarcasm or Humour      |                        |
| 1221203706429010000 | 25-Jan-20 | 112 | 0  | Others                 |                        |
| 1221201285107540000 | 25-Jan-20 | 101 | 93 | General Information    |                        |
| 1221202356035110000 | 25-Jan-20 | 149 | 89 | Expressions or Opinion |                        |
| 1221203363682970000 | 25-Jan-20 | 166 | 71 | Expressions or Opinion |                        |
| 1221202713700190000 | 25-Jan-20 | 133 | 9  | Others                 |                        |
| 1221202013641480000 | 25-Jan-20 | 110 | 17 | Expressions or Opinion |                        |
| 1221201817679400000 | 25-Jan-20 | 138 | 9  | Expressions or Opinion |                        |
| 1221201206686760000 | 25-Jan-20 | 202 | 55 | Expressions or Opinion |                        |
| 1221183388889090000 | 25-Jan-20 | 107 | 68 | Health Information     |                        |
| 1221198894585060000 | 25-Jan-20 | 300 | 25 | General Information    | Expressions or Opinion |

|                     |           |      |    |                        |                        |
|---------------------|-----------|------|----|------------------------|------------------------|
| 1221198843578060000 | 25-Jan-20 | 111  | 33 | Expressions or Opinion |                        |
| 1221198182237040000 | 25-Jan-20 | 450  | 42 | Others                 |                        |
| 1221198168441810000 | 25-Jan-20 | 117  | 42 | General Information    |                        |
| 1221169006410890000 | 25-Jan-20 | 116  | 34 | Expressions or Opinion |                        |
| 1221197425953550000 | 25-Jan-20 | 177  | 22 | Others                 |                        |
| 1221197039821710000 | 25-Jan-20 | 233  | 19 | Expressions or Opinion |                        |
| 1221196382087920000 | 25-Jan-20 | 130  | 13 | Sarcasm or Humour      |                        |
| 1221196215641090000 | 25-Jan-20 | 551  | 24 | Others                 |                        |
| 1221196054311440000 | 25-Jan-20 | 102  | 78 | General Information    |                        |
| 1221195791278180000 | 25-Jan-20 | 167  | 87 | Health Information     |                        |
| 1221195425580890000 | 25-Jan-20 | 102  | 82 | General Information    |                        |
| 1221194818300170000 | 25-Jan-20 | 199  | 1  | Others                 |                        |
| 1221194482886020000 | 25-Jan-20 | 122  | 1  | Expressions or Opinion |                        |
| 1221194438946570000 | 25-Jan-20 | 102  | 21 | Sarcasm or Humour      |                        |
| 1221193854419900000 | 25-Jan-20 | 123  | 2  | Others                 |                        |
| 1221193402378850000 | 25-Jan-20 | 114  | 27 | General Information    |                        |
| 1221169590379540000 | 25-Jan-20 | 138  | 54 | Expressions or Opinion |                        |
| 1221189664532500000 | 25-Jan-20 | 296  | 12 | Expressions or Opinion |                        |
| 1221189441521350000 | 25-Jan-20 | 227  | 27 | Expressions or Opinion |                        |
| 1221187348601400000 | 25-Jan-20 | 196  | 1  | Sarcasm or Humour      |                        |
| 1221187257727620000 | 25-Jan-20 | 123  | 38 | General Information    |                        |
| 1221185635228220000 | 25-Jan-20 | 115  | 33 | Expressions or Opinion |                        |
| 1221184906757200000 | 25-Jan-20 | 103  | 6  | Others                 |                        |
| 1221183375270170000 | 25-Jan-20 | 120  | 4  | General Information    | Expressions or Opinion |
| 1221172583908900000 | 25-Jan-20 | 276  | 36 | Sarcasm or Humour      |                        |
| 1221178019508860000 | 25-Jan-20 | 119  | 88 | General Information    |                        |
| 1221181110148820000 | 25-Jan-20 | 157  | 72 | Sarcasm or Humour      |                        |
| 1221180304502680000 | 25-Jan-20 | 131  | 28 | General Information    |                        |
| 1221178689355940000 | 25-Jan-20 | 101  | 57 | General Information    |                        |
| 1221177581082410000 | 25-Jan-20 | 109  | 29 | Health Information     |                        |
| 1221177121319580000 | 25-Jan-20 | 287  | 16 | Expressions or Opinion |                        |
| 1221176915567860000 | 25-Jan-20 | 306  | 11 | Sarcasm or Humour      |                        |
| 1221176858382860000 | 25-Jan-20 | 440  | 13 | Sarcasm or Humour      |                        |
| 1221172863601950000 | 25-Jan-20 | 1260 | 71 | Expressions or Opinion |                        |
| 1221172724367620000 | 25-Jan-20 | 121  | 29 | Expressions or Opinion |                        |
| 1221173576490870000 | 25-Jan-20 | 195  | 31 | Expressions or Opinion |                        |
| 1221171935658200000 | 25-Jan-20 | 169  | 76 | General Information    |                        |
| 1221171148852840000 | 25-Jan-20 | 151  | 18 | Expressions or Opinion |                        |
| 1221171004631730000 | 25-Jan-20 | 108  | 98 | General Information    | Expressions or Opinion |
| 1221170977012250000 | 25-Jan-20 | 143  | 19 | Sarcasm or Humour      |                        |
| 1221170528615970000 | 25-Jan-20 | 192  | 45 | Expressions or Opinion |                        |
| 1221170162197580000 | 25-Jan-20 | 735  | 84 | Sarcasm or Humour      |                        |
| 1221170029762420000 | 25-Jan-20 | 241  | 19 | Sarcasm or Humour      | General Information    |
| 1221168938886790000 | 25-Jan-20 | 117  | 81 | Expressions or Opinion |                        |
| 1221168896025080000 | 25-Jan-20 | 123  | 16 | Sarcasm or Humour      | General Information    |
| 1221168491086010000 | 25-Jan-20 | 143  | 4  | Sarcasm or Humour      |                        |
